# Supplementary material for: The effects of academic resilience on foreign language anxiety: A structural equation modeling-based multi-group analysis
Source: Research Square preprint supplement (doi:10.21203/rs.3.rs-7750527/v1), 2025-11-11
Supplement: Supplementary file 1 [file 2cdcacd202f47aceb00e2002.xlsx]

## Sheet: 上传BMC的数据 sav
ER1	ER2	ER3	ER4	MR1	MR2	MR3	MR4	MR5	MR6	MR7	SR1	SR2	SR3	SR4	SR5	SR6	SR7	SR8	SE1	SE2	SE3	SE4	SE5	SE6	AT1	AT2	AT3	AT4反	AT5反	AT6	AT7	AT8	NAME	SEX	AGE	REG
5	4	5	5	5	4	5	4	5	4	5	5	5	5	5	4	5	5	5	4	5	4	5	5	5	3	2	3	2	2	3	4	2	485	2	12	2
4	5	5	5	4	5	5	5	5	5	5	4	4	5	5	5	4	5	5	4	4	3	5	5	5	2	2	2	2	2	2	1	1	164	2	15	1
5	5	4	5	5	5	4	3	5	4	5	5	5	5	5	5	5	5	5	3	5	5	5	5	5	1	1	1	1	1	1	1	1	188	2	15	1
5	4	5	4	5	4	5	4	5	4	5	4	5	5	5	5	4	5	5	3	5	5	5	5	5	1	1	1	1	1	1	1	1	327	2	15	1
5	5	4	5	4	5	5	4	5	5	5	5	5	5	5	5	5	5	5	3	5	5	5	5	5	1	1	1	1	1	1	1	1	318	2	14	1
4	5	5	4	5	5	5	5	5	5	5	5	5	4	5	5	4	5	4	5	5	3	5	5	5	1	2	2	1	1	2	2	2	274	1	15	1
5	5	4	5	5	5	5	5	5	5	5	5	5	4	5	4	5	5	4	5	5	3	5	5	5	1	2	2	1	1	2	2	2	358	1	15	1
5	4	5	5	5	5	5	5	5	5	5	5	4	4	5	5	4	5	4	3	5	4	4	5	5	2	4	3	3	1	3	5	2	161	2	14	1
4	5	4	5	4	4	4	5	5	5	4	5	5	5	5	4	5	5	4	4	4	3	5	5	5	3	2	4	5	1	1	2	1	591	1	13	2
4	5	5	4	5	5	4	5	5	4	5	5	5	5	4	5	4	5	5	5	4	5	4	4	5	2	1	4	1	2	1	2	1	672	1	13	2
5	5	5	4	5	5	5	5	4	4	4	5	5	4	5	5	5	4	4	5	4	4	5	5	4	3	2	3	2	1	3	3	1	271	1	14	1
5	4	5	5	4	5	4	5	5	4	5	5	5	4	4	5	4	5	5	5	5	4	4	5	5	2	4	3	2	2	2	2	1	46	1	15	1
5	5	5	4	5	5	5	5	5	5	5	4	4	4	4	4	5	5	4	5	5	4	5	5	5	1	3	1	3	2	1	2	1	81	2	15	1
5	5	5	4	5	5	5	5	5	5	5	4	4	4	4	5	4	5	4	5	5	4	5	5	5	1	3	1	3	2	1	2	1	344	2	15	1
4	4	4	5	5	5	5	5	5	5	5	4	5	5	4	4	5	4	4	3	3	3	4	3	3	3	4	3	2	2	2	2	2	493	2	14	2
5	5	5	5	4	4	4	5	5	5	5	5	5	5	4	5	5	5	4	3	3	3	3	4	4	4	3	4	4	3	3	3	3	430	2	13	2
5	4	5	5	5	4	4	5	5	5	5	5	5	5	4	5	4	5	4	5	5	4	4	4	5	2	4	3	1	1	2	2	2	101	1	15	1
5	5	5	5	4	4	4	5	5	5	5	5	4	4	5	4	5	4	4	5	5	4	5	5	5	2	2	2	3	2	2	3	1	162	1	14	1
5	5	5	5	5	4	5	5	5	5	5	4	4	4	4	5	4	5	4	5	5	4	5	5	5	2	1	1	1	1	1	4	1	72	1	14	1
5	5	5	5	5	5	4	5	5	4	4	5	4	5	4	5	5	5	5	2	1	2	3	4	1	3	1	3	1	1	3	4	1	388	2	12	2
5	4	4	5	5	4	5	5	4	5	4	5	5	4	5	5	4	5	4	4	5	3	4	5	2	4	4	5	3	3	4	4	3	252	1	14	1
5	5	5	5	5	5	4	4	5	4	5	4	4	4	5	5	4	5	5	4	5	4	5	5	4	3	2	1	1	2	2	1	1	288	2	15	1
4	4	4	5	5	5	5	4	5	5	5	5	4	4	5	5	5	4	4	5	4	4	4	5	5	3	4	5	2	3	4	5	1	41	1	15	1
5	5	5	4	5	4	4	4	5	4	5	5	5	5	5	4	4	5	5	4	5	4	5	5	4	3	3	2	2	2	3	5	1	136	1	14	1
5	5	4	5	5	5	5	5	5	5	4	5	4	5	4	5	5	4	5	5	5	4	5	4	5	1	3	3	3	3	2	4	2	295	2	14	1
5	5	5	5	4	3	5	5	5	5	5	4	4	4	4	4	4	5	4	2	3	3	3	5	2	3	3	4	3	3	3	4	2	407	2	13	2
5	4	5	5	4	4	5	5	5	4	4	5	5	4	4	4	5	4	5	4	3	3	4	5	4	3	2	1	1	2	2	3	1	257	2	14	1
5	5	5	5	4	4	4	5	5	4	4	5	5	5	4	5	4	4	5	4	4	3	4	5	4	2	3	4	2	2	2	3	1	284	2	14	1
5	4	5	5	5	5	5	4	5	5	4	5	4	5	4	5	5	4	4	4	5	4	4	4	4	3	4	5	4	1	3	3	1	429	2	12	2
5	5	5	5	4	3	5	5	5	4	4	4	5	4	5	5	4	4	4	4	5	3	5	5	5	3	3	2	3	1	2	1	3	617	1	13	2
5	5	4	4	5	5	4	4	5	5	4	4	4	4	5	4	5	4	5	5	5	4	4	5	5	3	3	4	3	2	3	2	2	114	1	15	1
5	5	5	5	5	4	5	5	5	5	4	5	5	4	4	5	4	5	5	5	5	4	5	5	5	1	1	3	1	1	1	2	1	230	1	14	1
5	4	5	5	5	5	5	5	5	5	5	4	4	4	5	4	5	5	4	1	3	1	4	5	4	3	1	4	5	4	3	2	1	141	2	14	1
4	4	4	5	5	5	4	5	5	5	5	4	5	4	4	5	5	4	4	3	5	3	3	4	4	3	4	4	3	3	3	4	4	289	1	14	1
5	5	5	5	5	3	5	5	4	4	4	4	4	5	5	4	4	5	4	5	5	4	4	3	3	2	1	3	2	3	4	5	3	45	1	14	1
5	5	5	5	5	5	5	4	5	5	4	4	5	4	5	5	5	4	4	4	4	3	4	5	5	2	2	5	1	3	2	4	2	49	1	14	1
4	4	5	5	5	4	5	4	5	5	4	4	4	5	4	4	5	5	4	4	5	4	4	5	4	3	3	2	2	2	1	1	1	7	1	14	1
5	5	5	4	5	4	4	5	5	4	4	3	4	4	5	4	5	5	4	4	4	4	5	5	5	3	3	2	2	2	3	2	1	121	1	14	1
5	5	5	5	5	4	3	4	4	4	4	5	5	5	5	4	5	5	4	4	5	5	5	5	5	1	2	2	2	2	1	2	1	157	1	15	1
5	5	4	4	5	4	5	4	5	5	4	5	5	4	4	5	4	5	4	5	5	5	5	4	5	2	1	1	1	2	2	1	2	256	1	15	1
4	5	5	4	4	4	5	4	5	5	4	5	5	4	4	4	5	4	4	3	4	2	4	3	3	3	4	5	1	1	3	3	1	634	1	13	2
5	5	5	5	4	5	5	4	5	4	4	4	5	4	4	5	4	4	5	3	4	4	4	5	3	3	4	5	3	2	5	4	1	405	2	13	2
4	4	5	4	4	4	5	5	5	5	5	4	4	4	4	4	4	4	4	3	4	4	3	5	5	3	1	4	1	2	2	3	1	584	1	13	2
4	4	5	4	4	5	4	5	5	5	5	3	4	5	5	4	5	4	5	5	5	3	4	4	4	3	2	4	3	2	3	3	3	297	1	14	1
4	4	5	5	5	4	4	5	4	4	3	5	5	4	5	5	4	5	4	5	5	5	3	5	5	2	2	2	2	2	2	2	2	48	1	14	1
5	5	5	5	4	4	5	4	5	5	4	4	4	5	4	4	4	5	4	4	5	5	4	5	5	3	2	1	3	2	2	4	3	109	2	15	1
4	4	4	3	4	4	4	5	5	5	4	4	5	4	4	5	4	4	4	3	3	3	3	3	4	3	3	3	4	2	3	3	4	644	1	13	2
4	4	5	5	4	3	5	4	5	4	4	4	5	4	5	4	5	4	4	4	3	3	4	4	3	3	2	2	2	3	2	2	2	585	1	12	2
5	4	4	5	4	3	4	5	5	5	4	4	4	4	5	4	4	4	4	3	4	4	3	4	4	3	1	2	3	4	2	1	3	420	2	12	2
5	4	5	5	3	4	4	4	5	4	4	5	5	4	5	5	5	4	4	3	4	4	3	5	4	3	5	5	2	2	2	3	1	601	1	12	2
5	5	5	5	4	3	4	5	4	4	4	5	5	4	5	4	4	5	5	4	4	3	4	5	4	3	2	1	5	3	2	2	1	135	1	14	1
5	5	5	4	4	4	4	5	4	4	4	5	4	5	5	4	4	4	4	5	4	3	4	5	4	3	1	1	3	2	1	2	1	616	1	13	2
5	5	3	5	5	3	3	4	5	5	5	5	4	5	5	4	5	5	4	4	5	5	5	5	3	1	1	1	3	2	1	3	2	244	1	15	1
5	5	4	5	4	4	5	4	4	4	4	4	5	4	4	5	4	4	4	5	5	4	5	5	4	3	2	1	2	1	2	2	1	449	2	12	2
4	3	4	3	5	4	3	3	4	5	4	5	5	5	5	3	5	5	5	4	4	3	3	3	4	3	3	4	2	2	4	2	1	89	1	14	1
5	5	5	5	4	4	3	5	4	5	5	4	4	4	4	4	4	4	4	3	4	3	3	4	4	1	3	3	1	2	1	2	5	278	2	14	1
4	4	5	5	4	4	4	4	4	4	4	5	5	4	4	4	4	4	4	4	5	3	3	5	3	2	2	3	2	3	2	2	2	119	2	14	1
5	4	5	5	5	3	4	5	4	3	4	4	5	4	5	4	4	5	4	4	3	3	4	5	4	2	3	4	3	3	2	3	3	12	2	14	1
4	3	5	4	4	3	3	5	5	4	5	4	4	5	5	4	4	4	4	4	3	3	5	5	4	3	4	5	4	3	5	4	1	24	1	15	1
4	4	5	5	5	4	4	5	4	4	4	5	4	3	4	5	5	5	4	3	5	3	4	5	5	4	2	5	5	3	3	4	2	170	1	15	1
3	4	5	5	4	4	3	5	4	4	5	4	5	4	5	3	5	5	5	4	5	4	3	4	5	2	3	2	1	1	2	3	1	140	1	15	1
5	5	5	5	4	4	4	4	4	4	4	4	4	4	4	4	4	4	4	4	4	4	4	4	5	3	3	3	2	2	3	3	2	373	1	15	1
5	5	5	5	4	4	4	5	3	4	4	4	3	4	5	4	3	5	4	4	4	4	4	5	4	3	2	4	1	3	4	4	1	287	1	14	1
4	4	5	5	4	4	5	5	4	4	5	4	4	3	4	5	5	4	4	5	4	3	5	4	5	2	2	3	3	3	2	2	3	268	1	14	1
4	4	5	4	4	3	5	5	5	4	5	5	3	3	4	4	4	4	5	4	5	3	4	5	5	4	4	5	3	3	2	4	2	38	2	14	1
5	4	5	4	4	4	4	4	4	4	4	4	5	4	4	5	4	4	4	4	5	5	5	5	5	1	2	1	1	2	2	2	2	73	1	15	1
5	4	5	4	4	4	4	4	4	4	4	4	5	4	4	5	4	4	4	4	5	5	5	5	5	2	3	2	1	2	2	2	2	342	1	15	1
5	5	4	4	4	4	3	5	5	5	5	4	4	4	4	3	4	4	4	5	5	4	5	5	5	2	3	4	3	2	2	2	2	261	2	14	1
4	3	4	4	5	4	4	4	4	5	4	4	4	4	5	5	5	4	4	3	4	2	3	4	3	2	3	4	2	3	3	3	2	176	1	14	1
4	4	5	5	4	4	4	4	3	3	4	5	4	5	5	5	4	3	5	3	3	4	3	4	4	2	4	5	2	3	3	2	1	194	1	14	1
4	3	5	4	4	3	3	4	5	4	3	5	5	5	5	3	5	3	5	3	3	3	4	4	4	3	2	4	3	3	3	2	3	695	1	13	2
3	4	5	5	4	3	3	5	5	4	3	5	5	4	5	3	3	3	3	4	4	2	2	5	4	3	3	4	3	4	3	4	2	52	2	14	1
5	5	5	4	4	3	2	5	4	3	5	5	4	4	4	5	3	3	5	4	4	3	3	5	3	2	2	4	3	3	4	3	1	55	1	14	1
5	5	5	4	5	3	5	5	4	4	3	4	4	3	3	4	3	5	4	3	4	3	4	5	3	5	5	4	5	4	4	4	2	246	2	14	1
5	5	5	4	3	4	4	4	4	4	4	4	3	4	5	3	4	4	4	3	4	4	3	5	4	4	3	4	3	3	1	3	2	291	2	14	1
5	4	5	5	4	4	4	5	3	4	3	4	4	4	5	3	3	5	4	4	4	5	4	4	5	2	3	2	2	2	2	3	1	133	1	15	1
5	4	5	4	4	4	5	5	3	3	3	5	5	4	3	3	3	4	4	3	4	4	5	5	5	3	3	4	3	2	2	3	2	226	2	15	1
4	4	5	5	3	4	4	5	5	3	3	5	5	5	3	5	5	5	3	5	5	4	5	5	4	1	1	2	2	1	1	1	1	236	1	14	1
4	4	4	5	4	4	5	5	4	4	4	5	4	3	4	3	3	4	5	5	5	5	5	4	4	2	2	3	2	3	3	3	3	107	1	14	1
5	5	5	5	4	4	4	3	4	4	3	4	4	4	4	4	3	4	3	3	3	3	3	3	3	3	5	5	4	3	4	4	4	610	1	12	2
4	4	4	5	4	4	4	4	4	4	3	5	3	5	5	5	4	3	3	3	3	3	3	3	4	4	4	4	4	3	4	4	3	124	2	15	1
3	3	5	5	5	5	4	5	4	4	3	4	5	3	4	4	3	3	5	3	3	2	3	5	3	3	3	4	4	3	4	4	2	151	2	15	1
4	4	4	5	4	3	4	4	5	4	4	4	4	5	4	4	3	3	3	3	4	2	3	4	4	3	3	4	2	2	3	3	2	479	2	12	2
4	4	4	4	4	4	3	3	3	4	4	5	5	5	5	5	5	5	5	3	3	3	3	4	5	3	3	2	5	4	2	2	2	729	1	14	2
4	3	5	4	4	3	3	3	5	4	3	5	5	5	5	3	5	3	4	3	3	3	4	4	4	3	2	4	3	3	3	2	2	521	2	13	2
4	3	4	4	4	4	3	5	4	5	5	3	4	5	4	4	3	4	4	3	4	4	4	4	3	3	3	4	3	2	4	3	4	467	2	13	2
4	4	5	5	5	3	4	5	5	3	4	4	4	3	4	4	3	4	4	4	4	3	4	5	3	2	3	3	2	2	3	3	2	232	2	14	1
4	4	4	5	4	4	4	4	4	4	4	5	5	3	4	5	5	4	3	4	4	4	3	5	4	3	3	4	3	3	2	3	3	259	2	14	1
3	5	4	5	4	3	4	5	5	4	3	5	4	5	3	3	5	3	3	3	4	3	4	5	5	3	4	5	3	1	4	5	3	123	1	14	1
5	5	5	4	4	3	3	4	4	4	4	4	3	5	4	4	3	4	4	4	4	4	4	4	5	2	4	2	3	3	4	4	2	615	1	13	2
4	4	4	4	3	4	5	4	3	5	4	5	4	4	4	5	4	5	4	5	5	4	4	4	4	3	3	3	3	3	3	4	4	290	1	14	1
5	4	4	5	3	4	4	4	3	5	5	4	4	4	4	3	4	3	4	4	4	3	5	5	5	3	4	3	4	3	3	4	1	111	1	14	1
5	5	4	4	4	3	4	4	4	3	4	5	4	3	4	4	3	4	4	2	3	2	3	4	2	4	5	4	4	4	5	3	1	443	2	12	2
3	4	4	5	4	5	4	5	4	4	4	4	3	4	5	3	4	3	2	3	2	3	3	4	3	4	4	5	4	4	5	5	5	267	2	15	1
5	5	5	5	4	3	3	4	4	3	3	4	3	5	5	4	3	5	4	3	4	3	3	3	3	4	3	4	5	3	3	3	2	26	2	14	1
5	4	4	5	4	4	4	4	4	4	4	4	4	4	4	3	3	3	3	3	3	3	3	4	3	3	3	4	3	2	2	2	2	419	2	13	2
5	5	5	5	5	3	4	5	5	3	3	3	3	5	4	5	5	3	4	3	5	2	3	5	2	3	2	4	2	3	4	4	2	47	1	14	1
4	4	4	5	4	4	4	4	4	4	4	4	4	4	4	3	4	4	3	3	4	3	3	4	4	2	2	2	2	2	2	2	2	580	1	12	2
4	4	4	5	3	3	4	5	5	4	4	4	4	4	4	3	4	3	4	4	4	3	4	3	4	3	3	4	3	2	2	3	2	508	2	13	2
4	3	5	4	3	4	3	5	5	4	3	5	4	5	5	3	5	4	4	4	3	2	4	5	4	3	2	5	4	4	3	4	1	40	1	14	1
4	3	4	4	4	4	4	4	4	4	4	4	4	4	5	3	5	4	4	4	4	2	4	5	3	3	1	5	5	5	5	3	2	285	1	14	1
4	4	4	5	4	4	4	4	4	4	4	4	4	4	4	4	4	4	4	5	5	3	5	4	4	4	3	4	3	3	3	4	2	346	1	15	1
4	4	4	5	4	4	4	4	4	4	4	4	4	4	4	4	4	4	4	5	5	3	5	4	4	4	3	4	3	3	3	4	2	351	2	15	1
4	4	4	5	4	4	4	4	4	4	4	4	4	4	4	4	4	4	4	5	5	3	5	4	4	4	3	4	3	3	3	4	2	353	1	15	1
4	4	4	5	4	4	4	4	4	4	4	4	4	4	4	4	4	4	4	5	5	3	5	4	4	4	3	4	3	3	3	4	2	366	2	15	1
4	4	4	5	4	4	4	4	4	4	4	4	4	4	4	4	4	4	4	5	5	3	5	4	4	4	3	4	3	3	3	4	2	367	1	15	1
5	5	5	5	4	3	4	3	5	4	4	4	4	3	3	3	3	4	4	5	4	3	5	5	4	4	3	3	3	3	4	2	2	198	2	15	1
5	4	5	4	3	4	4	3	5	3	4	4	4	5	3	3	4	4	3	4	4	4	5	4	5	3	4	4	5	2	3	5	5	574	1	13	2
5	4	4	4	3	3	4	3	4	4	4	4	4	5	5	3	4	5	3	5	4	4	5	5	4	3	3	4	2	2	5	3	2	477	2	12	2
5	5	4	5	4	3	4	4	3	3	4	4	4	4	5	5	4	5	4	5	4	4	5	5	5	3	2	4	2	2	2	2	1	199	1	14	1
4	4	4	4	4	3	4	4	5	4	3	4	4	3	5	4	3	3	3	2	3	2	2	4	4	5	5	5	5	3	4	5	3	239	2	14	1
3	3	5	4	3	3	3	4	4	4	5	5	5	5	3	4	3	3	3	3	2	4	3	4	2	4	4	5	5	3	5	4	2	505	2	12	2
4	4	5	5	4	3	3	4	4	4	4	4	4	4	4	4	4	3	4	3	3	3	3	4	3	4	3	5	5	3	3	3	3	394	2	12	2
3	3	4	5	5	5	5	5	4	4	4	4	3	3	3	4	3	4	4	3	3	2	4	4	3	4	4	4	4	4	4	5	4	63	2	15	1
3	3	5	4	4	4	3	5	4	5	4	4	4	3	4	3	4	4	4	2	3	3	4	4	3	3	3	2	3	4	2	5	2	480	2	13	2
4	3	4	4	3	4	4	5	4	4	3	4	4	4	5	4	4	3	3	3	3	3	3	4	3	4	5	4	4	4	4	4	3	624	1	13	2
3	4	4	4	4	4	4	5	5	5	3	4	4	3	3	4	4	5	5	3	3	3	3	5	3	5	5	4	5	5	5	4	2	83	1	14	1
3	4	5	5	3	4	4	4	4	4	4	5	3	5	5	5	4	3	5	3	3	3	3	4	4	3	5	5	4	4	5	5	5	630	1	14	2
4	4	5	5	4	4	3	4	2	4	4	4	4	4	5	5	4	5	4	3	3	2	4	4	4	3	5	4	4	3	5	5	2	8	1	15	1
4	4	4	4	4	3	4	4	4	4	4	4	4	4	4	4	4	4	3	3	3	3	3	4	4	3	3	4	4	3	3	3	3	437	2	13	2
3	3	4	5	4	4	4	5	5	5	4	4	4	3	3	3	3	4	3	3	4	3	3	4	3	5	5	5	4	4	3	3	3	173	2	14	1
3	3	5	5	4	3	3	4	4	4	4	4	4	5	5	4	3	4	5	3	3	3	4	4	4	5	4	5	5	3	4	5	5	177	2	15	1
5	5	3	4	5	4	4	5	3	4	4	4	3	4	4	3	5	4	4	4	3	4	4	3	3	2	3	4	1	3	3	2	4	568	1	13	2
4	4	5	5	3	4	4	5	5	4	4	5	5	2	3	3	4	5	3	3	3	4	2	4	5	4	5	5	4	3	5	5	4	255	1	15	1
5	3	3	5	4	3	5	5	5	4	3	4	5	3	3	4	3	4	4	4	4	3	3	3	4	5	3	5	5	4	4	5	4	379	2	13	2
5	5	4	5	4	4	3	4	4	3	5	4	3	4	3	4	3	4	4	3	4	3	4	4	4	4	4	3	3	3	3	3	2	403	2	12	2
5	5	5	5	4	3	3	5	3	4	4	3	3	4	4	3	3	4	3	4	3	3	4	4	4	5	4	4	3	3	2	4	2	117	2	14	1
4	4	4	4	4	4	4	4	4	4	4	4	3	4	4	4	3	4	4	2	5	3	4	4	4	4	3	4	4	4	4	5	2	144	2	14	1
4	4	3	5	5	4	3	4	5	4	2	5	5	4	3	3	4	3	3	3	4	3	5	4	3	4	2	5	3	4	5	1	3	656	1	14	2
4	3	4	5	4	4	4	4	4	3	4	4	4	5	4	4	4	4	5	4	4	3	4	4	4	3	3	4	3	3	2	4	2	42	2	14	1
4	4	5	4	4	4	4	5	4	4	4	3	3	3	4	3	3	4	3	4	4	3	4	4	4	4	3	5	4	4	4	4	4	126	2	15	1
5	5	5	5	3	3	3	5	4	3	4	4	5	3	3	3	4	4	4	4	4	3	4	4	5	3	3	4	5	2	3	3	2	433	2	12	2
4	3	4	5	5	3	4	4	5	5	4	3	4	3	4	4	3	5	3	5	5	4	3	3	4	5	3	3	4	3	4	4	2	13	2	14	1
4	3	3	4	4	3	4	5	4	4	4	5	4	4	4	3	4	4	5	4	4	4	3	5	4	2	1	3	3	3	2	2	1	6	2	14	1
4	4	4	4	4	4	4	3	4	4	4	4	5	3	4	4	4	4	4	4	5	4	4	5	4	3	3	4	4	2	3	2	3	386	2	13	2
5	3	5	5	5	5	4	3	3	4	3	4	4	4	3	3	3	5	3	4	5	5	3	5	4	5	4	5	4	4	5	5	5	86	1	14	1
4	5	4	3	3	4	4	4	4	4	5	3	4	3	4	5	4	3	4	5	5	5	4	5	4	4	5	5	3	3	3	4	3	699	1	12	2
4	4	4	4	4	4	4	4	4	3	4	4	3	4	4	4	3	4	4	3	2	2	2	3	3	3	4	4	4	4	4	4	3	202	2	15	1
4	4	4	4	4	4	4	4	4	3	4	4	3	4	4	4	3	4	4	3	2	2	2	3	3	3	4	4	4	4	4	4	3	362	2	15	1
4	3	3	4	4	4	4	4	4	4	4	4	4	4	4	4	4	4	4	3	3	2	3	3	2	4	4	4	3	4	4	4	4	211	2	14	1
4	3	3	4	4	4	4	4	4	4	4	4	4	4	4	4	4	4	4	3	3	2	3	3	2	4	4	4	3	4	4	4	4	350	2	14	1
4	4	5	5	4	5	4	5	3	3	4	4	4	3	4	5	5	3	4	3	4	2	3	4	3	5	5	5	4	3	3	4	2	488	2	13	2
4	3	4	5	4	3	3	3	4	3	3	4	4	4	5	4	4	3	4	3	4	3	3	4	3	2	4	4	3	3	3	3	2	172	2	14	1
4	4	4	4	3	4	4	4	4	4	4	4	4	3	4	5	4	4	4	3	3	3	3	4	4	4	4	4	4	4	4	3	3	462	2	13	2
4	3	3	4	3	3	4	5	4	4	4	4	4	4	5	4	3	3	5	3	4	3	3	4	3	4	4	5	5	3	3	3	3	685	1	13	2
5	4	4	3	4	4	5	3	3	4	3	5	5	4	3	4	5	4	4	3	4	2	4	4	3	3	2	3	3	1	3	3	1	654	1	12	2
4	4	5	5	5	4	3	5	5	3	4	3	4	4	3	4	3	4	4	3	4	3	3	4	4	5	5	5	4	3	5	4	1	648	1	13	2
4	3	5	4	4	3	5	4	4	4	3	3	3	4	5	3	3	4	5	3	3	4	4	4	3	4	3	4	3	3	4	5	3	413	2	12	2
4	4	4	4	4	4	4	4	4	4	4	3	3	4	4	4	3	3	3	3	3	3	4	4	4	3	4	4	4	3	4	4	4	248	1	15	1
4	4	4	4	4	4	4	4	4	4	4	3	3	4	4	4	3	3	3	3	3	3	4	4	4	3	4	4	4	3	4	4	4	354	1	15	1
4	4	5	4	5	4	4	3	3	4	4	4	4	3	3	4	3	3	3	3	4	3	3	4	4	3	3	4	3	3	2	3	1	146	2	14	1
4	4	4	5	4	3	4	3	4	4	5	4	3	4	4	3	4	4	5	3	4	4	3	4	4	4	3	2	4	3	2	3	2	486	2	13	2
4	4	3	4	4	3	5	5	5	5	3	4	3	3	3	3	4	5	4	3	4	3	4	5	3	5	3	4	4	3	3	3	2	305	1	15	1
4	4	4	5	4	4	4	5	4	4	3	4	3	3	4	4	4	4	3	3	4	3	4	4	4	3	4	4	3	3	4	4	3	69	2	14	1
4	4	4	4	4	4	4	4	4	4	4	3	4	4	3	4	4	3	4	3	4	3	4	4	4	3	2	3	4	3	3	3	3	704	1	13	2
4	4	4	4	3	4	4	4	4	4	4	4	4	4	3	3	4	3	3	4	3	4	3	4	4	4	3	3	4	3	3	3	3	383	2	13	2
5	4	3	5	4	4	4	4	4	5	3	3	3	4	4	5	4	3	4	4	4	4	4	3	3	2	4	5	3	3	2	4	3	235	1	14	1
5	5	3	3	5	4	5	4	4	3	3	3	3	4	3	3	4	4	3	4	4	4	4	3	3	2	2	2	2	3	3	3	3	43	2	14	1
4	3	5	3	4	3	4	3	5	5	3	3	3	4	5	3	3	4	4	4	4	3	4	4	3	4	3	5	4	3	3	5	4	487	2	14	2
4	4	4	5	4	3	3	4	4	3	4	4	5	4	4	4	5	4	5	4	4	3	4	4	4	2	1	1	2	3	3	3	2	303	1	14	1
4	3	5	5	4	2	4	4	3	5	4	5	4	3	4	3	5	5	3	4	3	4	3	4	5	5	5	5	3	3	2	2	3	209	1	14	1
4	4	4	5	4	3	4	4	4	4	4	4	4	3	4	4	4	3	3	4	4	3	3	5	4	3	3	4	2	3	2	3	2	228	2	14	1
4	3	5	4	4	3	5	3	5	4	5	5	5	4	4	5	4	5	4	3	5	3	4	4	5	2	2	1	2	3	2	3	1	5	1	15	1
5	5	5	5	3	3	4	4	4	4	4	3	4	3	3	3	4	5	5	5	5	3	3	5	3	3	1	5	3	3	3	4	5	171	1	15	1
4	3	4	5	4	4	4	5	5	4	4	4	3	3	3	5	4	3	4	3	4	4	4	5	4	3	3	2	1	2	2	3	2	592	1	13	2
3	4	3	3	4	3	4	5	3	5	3	4	5	3	5	4	5	4	4	4	5	4	4	3	4	3	3	2	3	2	3	3	4	526	2	14	2
5	4	4	4	4	3	3	5	3	4	5	4	4	2	4	4	3	5	3	5	4	3	4	5	5	4	3	3	4	3	4	4	3	17	2	14	1
3	3	5	5	4	3	4	4	4	4	3	4	5	4	4	4	4	5	3	5	5	4	5	3	5	2	4	3	3	3	3	4	2	1	2	14	1
3	3	5	5	4	4	3	5	3	3	3	5	4	5	4	5	5	4	3	4	5	4	4	5	5	3	3	5	4	3	2	3	1	298	1	14	1
4	4	5	5	4	3	3	3	4	4	4	4	4	4	4	4	3	3	4	5	5	4	4	4	5	1	2	1	2	2	2	3	1	132	1	14	1
3	3	4	3	5	4	3	4	4	4	4	4	4	3	4	4	4	3	3	1	1	1	2	3	2	3	4	3	5	5	5	5	3	538	2	12	2
4	4	5	5	3	4	2	3	4	5	4	4	2	4	5	4	4	5	3	2	2	1	2	2	2	3	4	4	2	4	4	5	1	576	1	12	2
5	3	4	4	3	4	5	3	4	3	5	3	2	4	5	4	4	3	5	3	4	2	1	3	4	5	4	5	5	4	5	4	3	675	1	13	2
3	3	4	4	4	4	4	4	4	4	4	4	4	3	4	3	4	4	4	2	3	2	3	4	3	4	3	3	3	4	3	3	3	652	1	13	2
4	3	4	4	4	4	3	4	4	3	4	4	4	4	4	3	4	4	4	4	1	2	4	3	3	3	3	3	2	2	3	3	1	153	1	14	1
3	3	3	3	4	4	4	4	4	4	4	4	4	4	4	4	4	4	4	3	3	2	3	4	3	4	4	4	4	3	4	2	2	543	2	13	2
4	3	5	3	3	4	4	5	3	4	4	4	4	3	3	3	4	4	5	3	3	2	2	4	4	3	4	5	4	4	4	4	4	459	2	12	2
4	3	5	4	3	4	4	5	4	4	3	3	3	3	5	4	4	3	4	3	5	2	3	3	3	3	2	2	4	3	3	5	3	250	1	14	1
4	3	5	3	5	3	3	3	4	3	4	4	4	3	5	4	3	3	4	3	2	3	4	4	3	4	2	4	3	3	4	4	4	661	1	13	2
4	3	4	5	4	3	3	4	5	5	4	3	3	4	4	4	3	4	3	3	4	3	4	3	3	4	4	4	3	3	4	4	3	16	2	15	1
4	3	5	4	3	4	4	4	4	3	3	4	4	3	5	4	4	3	3	3	4	4	3	4	2	4	4	4	4	3	4	3	3	454	2	13	2
4	4	5	4	3	4	4	4	4	4	3	4	3	4	3	4	3	3	4	3	4	3	3	4	3	4	4	4	3	3	4	5	2	423	2	12	2
4	4	4	4	3	4	4	4	4	3	3	4	4	3	5	3	3	3	4	3	4	3	3	4	3	4	4	3	4	4	3	3	2	444	2	13	2
4	4	4	4	4	3	4	4	4	4	4	4	4	3	3	4	3	3	3	3	3	3	3	4	4	3	3	3	4	4	4	2	2	396	2	12	2
3	3	4	5	4	3	4	3	4	4	3	4	4	5	5	4	4	3	3	3	4	2	3	5	3	3	2	2	2	3	2	2	2	168	2	15	1
3	3	4	4	4	4	4	4	4	4	4	4	3	4	4	3	4	4	3	4	3	3	3	4	3	4	4	4	4	3	3	4	2	573	1	12	2
5	3	3	5	5	4	4	5	5	4	4	5	5	4	3	3	4	5	4	3	4	3	3	4	3	4	5	5	5	3	5	5	3	445	2	12	2
4	4	3	4	4	4	3	4	4	4	4	4	5	3	3	4	4	4	4	3	3	3	4	4	4	5	4	4	4	4	4	4	4	676	1	13	2
4	4	5	4	3	4	4	5	4	4	3	4	4	4	4	4	4	5	3	3	3	3	4	4	4	3	3	5	5	1	3	3	2	435	2	12	2
3	4	5	3	3	3	3	3	4	4	3	5	5	4	4	4	4	5	3	3	3	3	4	5	3	5	4	5	4	3	5	2	4	497	2	13	2
4	4	3	4	3	4	3	4	4	4	4	4	4	4	4	3	4	3	4	3	4	3	3	4	4	2	3	4	2	3	2	4	2	242	1	14	1
4	4	3	4	3	4	3	4	4	4	4	4	4	4	4	3	4	3	4	3	4	3	3	4	4	2	3	4	2	3	2	4	2	361	1	14	1
4	4	4	4	4	4	4	4	4	4	4	3	3	3	4	3	3	4	3	3	4	3	4	5	3	3	4	3	3	3	4	4	3	324	2	15	1
4	4	4	5	3	4	3	4	4	4	4	3	3	5	4	3	3	5	4	4	4	3	4	4	4	4	5	5	3	3	4	4	4	282	2	15	1
4	4	3	4	4	4	4	4	4	4	4	4	3	3	4	4	3	4	4	4	4	3	4	4	4	2	3	2	3	2	2	2	2	555	1	13	2
4	4	4	5	4	3	3	4	4	4	5	3	3	4	4	4	4	3	4	4	4	3	4	5	4	4	4	3	4	3	4	3	2	218	1	15	1
4	3	5	4	3	3	3	5	5	4	4	3	3	4	4	4	4	5	3	5	4	3	4	4	4	3	2	2	3	2	3	3	3	269	1	14	1
4	4	5	4	4	3	4	3	4	4	4	3	3	4	4	3	4	4	4	4	3	4	4	5	4	2	3	4	3	3	4	4	2	22	1	15	1
4	3	5	4	4	3	4	4	4	4	3	3	4	4	4	4	3	3	4	4	4	4	4	4	5	3	3	3	2	3	4	3	3	222	2	15	1
5	4	4	4	4	3	3	5	3	4	3	4	3	4	4	3	4	4	4	4	5	4	5	4	4	3	3	4	4	2	2	3	2	603	1	13	2
4	3	5	5	4	3	2	5	4	5	4	4	5	2	3	4	3	3	5	4	5	3	4	5	5	4	5	5	4	3	4	4	3	66	2	15	1
4	4	5	5	3	3	4	4	4	3	4	4	4	3	4	3	3	3	3	4	5	4	4	5	4	1	1	1	1	1	1	2	1	191	2	14	1
4	3	5	4	3	2	2	5	5	4	3	4	4	4	4	4	3	5	3	2	3	1	2	4	4	4	5	4	5	3	3	4	2	525	2	12	2
4	3	3	3	3	3	3	4	4	4	4	4	5	4	4	5	3	3	3	3	2	3	4	3	2	4	4	3	3	4	3	2	4	481	2	12	2
4	3	4	4	4	3	3	4	3	4	4	4	4	4	4	3	3	3	4	2	2	3	5	3	2	3	4	4	4	4	4	4	2	612	1	12	2
3	3	3	3	3	3	3	5	3	3	3	5	5	5	5	5	5	5	5	3	3	3	3	3	3	3	3	2	1	3	3	3	3	724	1	13	2
4	3	4	5	4	3	3	3	3	3	4	5	4	5	4	4	4	4	4	3	3	3	3	3	3	4	4	5	4	3	4	4	2	587	1	12	2
4	4	4	5	4	4	4	3	3	4	4	3	3	4	4	4	4	5	5	2	3	3	3	4	3	4	4	4	3	4	5	4	3	506	2	13	2
3	3	3	3	3	4	5	3	4	4	3	5	4	5	5	4	5	3	5	3	3	3	3	3	3	3	3	4	3	3	2	4	4	727	1	14	2
4	3	4	3	4	3	3	4	4	3	4	4	4	3	5	5	4	3	4	3	3	3	3	3	3	3	4	5	5	4	5	5	4	401	2	13	2
5	4	3	4	4	5	3	3	3	5	3	5	3	4	3	4	4	5	4	3	4	2	4	3	3	3	5	4	2	3	4	4	3	489	2	13	2
4	3	5	4	4	3	3	3	4	3	4	5	4	3	5	4	4	4	4	3	3	2	4	4	3	5	5	4	4	3	3	2	3	600	1	12	2
3	3	5	5	3	3	4	3	4	4	4	4	4	4	5	4	3	4	5	4	4	2	3	4	2	3	4	5	3	4	2	2	3	80	1	14	1
5	5	4	3	4	3	5	3	3	4	3	4	3	5	4	4	3	3	4	3	3	2	3	4	4	2	3	3	2	2	2	3	1	283	1	15	1
4	4	5	4	4	3	3	2	4	4	4	4	4	4	3	5	3	5	4	3	4	3	4	5	1	3	1	1	3	1	1	5	1	626	1	14	2
4	4	4	5	4	3	4	4	4	4	4	3	3	3	4	4	3	4	4	3	3	3	4	4	3	4	3	3	3	3	3	3	3	84	1	14	1
4	4	4	4	4	3	4	4	4	4	4	4	3	3	3	4	3	3	4	3	4	3	3	4	3	3	4	5	3	3	4	3	2	270	2	14	1
4	4	4	4	4	3	4	4	4	4	4	4	3	3	3	4	3	3	4	3	4	3	3	4	3	3	4	5	3	3	4	3	2	360	2	14	1
4	3	5	4	4	3	2	4	4	4	4	3	4	3	5	5	3	4	3	3	3	3	3	4	4	3	3	2	3	3	2	5	2	476	2	13	2
3	4	4	4	4	3	3	4	4	4	4	4	4	4	3	3	3	4	3	3	4	3	3	3	4	4	4	5	4	4	4	4	3	227	2	15	1
4	4	5	5	3	3	4	4	4	3	3	4	3	4	4	4	4	3	4	3	4	3	3	4	4	4	4	5	5	3	3	3	2	417	2	13	2
4	3	4	5	4	4	3	4	4	4	4	4	4	3	3	5	4	3	3	3	4	3	4	3	4	4	5	5	3	3	2	2	2	78	2	15	1
4	3	4	5	4	3	4	5	4	4	3	4	3	3	4	3	4	4	4	3	4	3	3	4	4	4	4	4	4	3	4	4	3	183	1	15	1
5	4	4	5	4	3	3	4	4	3	3	4	3	4	4	4	4	3	4	3	4	3	3	4	4	1	4	3	3	2	3	3	2	14	1	14	1
4	3	4	4	4	3	4	4	4	4	3	4	4	3	4	3	4	4	3	4	3	3	4	4	3	3	2	4	2	2	2	4	3	243	1	15	1
3	3	4	4	4	3	4	4	4	4	4	4	3	4	4	4	3	3	4	3	4	2	4	4	4	3	3	3	3	4	4	4	3	212	2	14	1
4	4	4	4	3	3	3	4	4	4	4	4	3	4	4	4	4	3	4	4	4	3	4	4	4	3	3	2	3	3	3	4	3	113	2	14	1
3	3	4	5	5	3	5	4	5	5	4	4	3	4	4	5	4	3	3	5	4	4	4	3	4	2	1	2	2	3	2	1	2	224	1	15	1
4	3	4	4	4	4	4	3	5	4	3	4	3	4	3	3	4	3	3	4	5	4	4	4	3	3	3	2	2	3	2	3	2	39	1	14	1
3	3	4	5	4	3	3	4	3	3	4	5	4	4	5	5	4	4	4	4	5	4	4	5	4	1	3	1	2	3	3	3	1	163	1	15	1
4	3	4	5	4	4	4	4	5	3	3	4	3	4	3	4	4	3	3	4	4	4	5	4	5	3	3	5	2	3	4	5	5	272	2	14	1
4	4	5	5	4	4	4	4	4	3	3	3	4	3	5	3	3	5	5	5	5	4	5	4	4	2	2	4	2	3	3	3	3	105	2	14	1
4	4	5	4	4	3	3	4	4	3	3	4	4	3	4	4	3	3	5	5	5	4	4	5	4	3	4	4	3	3	4	4	3	301	1	14	1
4	4	4	5	4	3	4	4	4	3	3	4	4	4	3	3	3	4	3	5	5	3	5	5	4	2	3	3	2	2	2	3	1	193	1	14	1
4	3	3	4	4	3	3	3	3	4	4	4	5	4	4	3	4	4	4	3	2	2	2	3	3	4	3	4	4	3	4	3	2	514	2	13	2
5	3	5	5	4	3	3	3	3	4	5	4	3	3	3	3	3	3	4	2	3	2	2	3	3	4	5	5	3	4	5	5	2	679	1	12	2
4	4	4	5	3	3	3	3	3	4	4	4	4	4	4	3	4	4	4	3	2	3	2	4	2	4	4	4	4	4	4	4	4	474	2	12	2
5	3	5	4	3	3	3	4	4	3	3	4	3	4	4	3	4	4	4	2	3	2	3	3	3	4	1	5	4	3	3	3	1	613	1	12	2
4	3	4	5	4	3	3	4	4	4	4	3	3	4	4	4	4	5	4	3	3	2	2	4	3	4	5	4	4	3	4	4	3	473	2	12	2
3	3	4	3	4	3	3	5	4	4	3	5	3	4	5	5	5	4	4	3	2	3	3	4	2	5	5	5	4	4	4	4	2	128	1	15	1
2	3	3	3	4	3	3	4	4	4	5	4	3	5	5	4	4	3	4	2	3	2	2	5	3	4	3	5	3	3	4	4	2	240	1	14	1
5	5	3	3	5	4	3	3	4	5	3	3	3	5	3	3	5	3	3	2	2	2	3	3	5	3	2	3	2	1	1	2	1	664	1	12	2
4	3	5	4	4	3	3	3	4	3	3	4	4	4	4	4	4	3	3	3	3	2	3	4	3	5	4	5	4	4	5	5	5	87	2	15	1
4	4	4	3	3	4	3	4	3	4	3	3	4	4	4	4	3	3	3	3	3	3	3	3	3	4	4	3	3	3	3	3	3	551	2	14	2
4	3	4	5	3	3	3	4	4	3	4	4	4	4	4	4	4	4	4	3	3	2	3	3	5	3	3	3	3	3	2	1	1	27	1	14	1
4	3	4	5	3	3	3	4	4	3	4	4	4	4	4	4	4	4	4	3	3	2	3	3	5	3	3	3	3	3	2	1	1	334	1	14	1
4	4	4	3	3	3	3	4	3	4	3	4	3	4	5	4	3	5	4	3	3	3	3	4	3	4	4	5	3	3	3	3	3	65	2	14	1
4	3	4	3	4	3	3	4	4	3	3	5	3	3	5	5	5	3	4	3	4	3	3	3	3	4	5	4	4	3	3	3	1	409	2	13	2
3	3	4	4	4	4	4	3	4	4	3	4	4	3	4	4	4	4	4	3	3	3	4	3	4	3	3	4	2	3	4	3	3	393	2	13	2
3	3	4	4	4	3	3	4	3	4	4	4	4	4	4	4	4	3	4	3	4	3	3	4	3	3	2	3	2	3	3	4	2	431	2	12	2
4	4	5	5	4	4	3	4	4	3	3	3	3	3	4	4	3	4	3	4	3	3	3	4	3	4	4	4	4	3	4	3	4	30	2	15	1
4	3	4	5	4	3	4	4	3	3	4	4	4	3	4	3	3	5	4	3	3	3	4	4	3	4	4	4	4	4	4	2	3	54	1	14	1
4	4	4	5	4	3	3	4	4	3	4	4	4	3	3	4	3	4	3	4	3	3	2	4	4	4	5	5	4	4	2	2	2	57	1	14	1
4	3	4	4	4	4	3	3	4	3	3	4	4	4	5	3	4	3	4	3	4	3	4	4	2	3	4	4	4	3	3	3	4	692	1	14	2
4	3	4	4	4	4	3	4	4	4	4	4	3	3	3	4	3	4	3	3	4	3	3	3	4	4	4	4	4	4	4	4	4	456	2	13	2
3	3	4	4	4	3	3	4	4	4	4	4	4	4	4	4	2	4	4	3	3	2	4	4	4	5	5	5	4	4	4	5	5	19	2	15	1
4	4	5	5	4	3	3	4	3	3	4	3	3	4	4	3	3	4	3	4	3	3	3	4	3	4	2	5	4	3	4	4	3	20	2	15	1
4	3	4	4	4	3	3	4	4	3	3	4	3	4	5	3	3	4	3	3	4	3	3	4	3	3	2	4	4	3	3	4	3	395	2	13	2
4	3	3	4	4	4	3	4	4	4	4	4	3	3	4	3	3	3	4	3	3	3	4	4	3	3	4	3	4	2	3	3	3	448	2	13	2
5	5	4	4	3	3	4	5	3	3	5	5	3	3	5	5	4	5	3	3	4	2	4	4	4	5	5	5	5	5	3	4	4	590	1	13	2
4	3	4	4	4	4	3	3	4	3	4	4	4	3	4	5	4	3	4	3	3	3	4	4	4	4	2	4	3	3	4	3	5	441	2	13	2
4	4	3	4	4	4	4	4	4	4	3	4	3	2	4	4	3	4	3	4	4	3	3	4	3	4	3	4	3	3	4	4	4	68	1	15	1
4	4	4	4	3	4	3	4	4	4	4	3	3	3	4	3	4	4	3	4	3	3	3	4	4	3	3	3	2	3	3	3	2	302	1	14	1
3	3	4	4	3	4	4	4	4	3	4	4	3	4	4	3	3	3	4	3	4	3	3	4	4	3	3	4	2	3	3	4	3	438	2	12	2
5	4	3	5	4	3	3	3	4	3	4	3	4	4	4	3	3	3	3	4	4	3	3	4	3	2	3	2	2	3	3	3	2	2	2	15	1
5	4	4	3	4	4	3	5	3	3	4	4	3	3	3	3	4	3	4	3	3	3	4	4	4	4	5	4	3	3	3	2	3	426	2	14	2
5	3	4	4	3	3	4	4	3	4	4	4	3	3	4	5	3	4	3	3	3	3	4	4	4	3	3	2	3	3	4	4	3	716	1	12	2
4	4	4	4	3	3	3	4	4	3	4	4	3	4	4	4	4	4	4	4	4	3	4	4	3	4	3	3	3	3	4	3	3	380	2	13	2
4	3	4	5	3	4	4	3	5	4	3	4	3	3	4	5	3	3	4	4	4	3	3	4	4	3	3	4	3	2	2	3	3	450	2	12	2
4	4	4	5	3	4	4	4	4	3	3	3	4	3	4	3	4	4	4	4	3	3	3	5	4	4	4	3	3	3	2	2	2	3	2	15	1
4	3	5	5	4	3	4	3	4	4	4	3	3	3	4	4	3	5	3	4	4	3	3	5	3	4	3	4	3	3	4	4	3	179	2	14	1
4	3	3	5	3	3	4	5	4	4	3	4	4	3	4	3	4	3	4	3	5	3	3	5	3	3	2	3	4	2	3	3	2	519	2	12	2
3	3	4	5	4	4	3	3	4	3	4	4	4	4	4	4	4	4	3	3	4	4	4	4	4	4	4	4	3	4	4	4	4	192	2	15	1
5	4	5	4	4	3	3	4	3	3	4	4	3	4	4	4	3	4	4	4	5	3	4	4	3	4	3	4	4	4	4	3	2	552	1	12	2
3	3	4	5	4	3	3	5	4	3	3	4	3	4	5	4	4	3	3	4	4	3	4	5	3	3	4	5	4	4	4	4	3	260	1	14	1
3	4	4	3	4	3	3	4	3	3	4	4	5	3	4	5	3	4	3	3	3	3	5	5	4	3	4	4	4	1	3	3	4	665	1	12	2
3	4	5	5	3	3	3	5	4	4	5	3	3	3	3	4	4	5	3	4	4	3	4	5	4	3	3	3	3	3	2	4	2	451	2	13	2
3	3	3	4	4	3	4	4	4	4	4	3	4	4	4	3	4	4	4	4	4	4	4	5	3	4	5	5	3	4	4	4	3	219	1	14	1
4	3	3	4	4	2	2	3	3	4	5	4	4	5	5	3	4	3	4	4	3	3	5	5	4	2	1	4	1	3	4	4	3	701	1	13	2
3	3	4	4	4	3	4	4	4	4	5	3	3	3	4	3	4	3	3	4	3	3	5	5	4	3	5	5	3	3	4	4	4	347	1	15	1
4	4	4	3	4	4	3	3	4	3	4	4	3	3	4	3	4	3	3	5	4	3	4	4	4	4	3	3	4	3	3	2	3	127	1	15	1
3	3	4	3	4	3	3	5	4	3	3	4	4	4	4	3	3	3	3	3	5	4	4	5	5	1	3	2	2	2	2	3	1	195	1	14	1
3	3	4	3	5	5	3	4	3	3	4	3	4	4	4	3	3	5	4	5	5	3	5	5	4	2	2	1	2	1	2	4	2	263	1	15	1
5	3	4	5	3	4	4	4	4	3	5	5	5	4	4	4	5	4	3	2	2	1	2	3	2	4	2	3	5	3	3	4	2	21	1	15	1
4	3	3	4	4	4	4	4	4	3	3	4	3	3	4	4	4	3	4	3	3	3	3	3	3	4	4	4	4	3	4	2	2	595	1	12	2
3	3	4	4	4	3	4	5	3	3	4	3	3	4	4	3	2	3	3	3	3	2	3	4	3	4	4	4	5	3	4	4	3	299	1	14	1
3	3	4	3	3	3	4	4	4	3	4	4	3	4	4	4	4	3	3	3	3	3	3	4	3	4	5	4	4	4	4	4	3	572	1	13	2
4	5	3	3	5	4	3	3	3	4	3	5	5	4	3	5	4	3	4	3	3	4	5	3	2	4	3	4	4	5	5	4	3	495	2	12	2
3	3	4	3	4	4	4	4	4	4	4	3	3	3	3	3	4	3	4	3	3	3	3	4	4	4	4	4	3	3	5	5	4	221	2	15	1
3	3	4	4	4	4	4	4	4	4	4	3	3	3	3	3	4	3	4	3	3	3	3	4	4	4	4	4	3	3	5	5	4	365	2	15	1
3	2	4	3	3	3	4	3	5	4	3	4	3	4	5	3	4	3	5	3	4	3	4	3	3	3	3	4	3	4	4	5	4	689	1	13	2
4	4	3	4	3	3	4	4	3	3	3	4	4	4	4	4	3	3	3	3	3	3	3	4	4	3	3	3	3	2	3	3	3	427	2	12	2
4	3	4	3	4	3	4	3	4	4	3	4	3	4	3	3	4	3	4	3	3	4	3	4	3	3	4	4	3	2	3	4	4	469	2	13	2
5	3	4	3	3	3	3	4	4	4	4	3	3	4	3	3	3	4	3	4	3	3	3	4	3	5	4	3	4	3	4	5	3	412	2	12	2
5	5	3	4	4	3	4	4	4	3	3	3	3	5	3	5	3	5	4	3	4	4	3	3	4	4	5	4	4	3	4	5	2	60	1	15	1
3	3	4	3	3	4	3	4	4	3	4	4	4	3	4	4	3	3	4	3	4	4	3	4	3	3	4	2	4	3	4	4	3	483	2	13	2
4	4	4	3	4	3	3	3	3	3	4	4	4	4	3	4	4	3	3	3	4	4	3	4	3	3	3	4	2	3	3	3	4	640	1	13	2
5	4	5	5	3	4	3	4	4	3	3	4	3	5	4	5	3	5	3	3	4	3	4	5	3	5	5	5	5	5	4	5	5	152	2	15	1
4	3	4	5	3	3	3	4	4	3	4	4	4	4	3	3	4	4	3	3	4	4	3	4	4	4	3	3	3	3	2	3	1	484	2	12	2
4	4	4	3	3	3	4	4	3	3	4	4	4	3	3	4	4	3	4	4	4	3	4	4	3	4	4	4	4	3	4	4	3	655	1	13	2
3	2	3	5	4	3	3	3	4	3	5	4	3	5	5	3	3	4	3	3	4	4	3	4	4	5	3	3	4	3	4	5	5	143	1	14	1
4	4	4	4	4	4	3	4	3	3	3	3	3	4	4	3	3	3	4	4	4	2	3	5	4	2	2	4	2	2	1	3	1	293	1	14	1
4	3	3	3	3	3	4	3	5	3	4	3	3	4	4	5	4	3	3	3	4	3	5	4	4	5	1	3	5	4	4	5	2	280	1	15	1
4	3	4	4	4	3	3	3	4	3	4	4	5	3	3	4	4	3	3	3	4	4	3	5	4	4	3	3	4	3	4	3	2	300	1	15	1
5	5	4	4	4	3	3	4	3	3	4	3	3	3	3	4	3	3	3	3	4	3	4	5	4	3	3	3	5	1	4	3	2	414	2	12	2
4	5	3	3	4	4	3	4	3	3	4	3	4	3	3	5	4	3	3	3	4	4	4	4	4	5	5	5	5	4	3	5	4	470	2	13	2
3	3	5	4	4	3	3	3	4	4	4	4	3	3	3	3	4	3	3	2	2	1	3	4	2	5	5	5	3	4	5	5	3	597	1	12	2
4	4	5	4	3	3	2	5	3	3	3	4	4	3	3	4	4	3	4	3	3	2	2	2	3	5	4	5	5	4	4	4	4	387	2	13	2
3	3	3	5	4	3	3	3	4	4	4	4	4	4	3	3	3	3	3	3	3	2	2	3	3	2	5	5	1	3	3	3	2	668	1	12	2
4	2	4	4	3	3	4	4	4	4	2	4	3	4	4	3	3	4	4	3	3	2	2	4	3	4	2	4	3	3	2	4	2	104	2	14	1
4	4	3	3	4	3	5	4	3	3	4	3	4	2	3	3	3	4	3	3	3	3	2	4	2	4	4	4	3	3	3	5	5	130	2	15	1
5	3	5	5	3	3	4	5	3	4	3	3	4	1	3	5	5	5	4	3	4	2	3	2	4	5	5	5	5	5	5	4	3	457	2	13	2
3	3	4	5	3	3	3	3	3	3	3	4	4	5	5	5	5	5	3	3	3	2	3	3	4	5	5	5	5	5	5	5	3	181	2	15	1
3	3	4	4	4	3	3	4	4	4	4	4	3	3	3	3	4	3	3	2	3	3	3	4	3	3	4	4	4	3	3	3	2	436	2	12	2
3	4	4	4	4	4	3	4	4	4	3	3	3	3	3	3	3	3	3	2	3	3	3	4	3	3	3	4	3	4	2	4	3	637	1	13	2
4	3	4	3	4	3	3	4	4	3	4	3	3	4	3	4	4	4	5	3	4	2	3	4	3	2	4	4	2	3	2	3	1	241	1	15	1
4	3	4	3	4	3	4	3	4	4	3	3	3	4	3	3	4	4	3	3	4	4	3	3	2	4	4	5	4	3	4	4	3	620	1	12	2
4	3	4	3	4	3	3	4	4	3	3	3	3	4	4	4	3	5	5	3	4	2	3	4	4	3	5	4	2	4	5	4	3	29	2	15	1
4	3	4	4	3	3	3	4	4	4	3	4	4	3	4	4	3	3	4	3	4	3	4	3	3	4	4	4	3	3	4	4	3	499	2	12	2
4	3	4	4	4	4	4	3	3	3	3	3	3	4	4	4	3	3	4	3	3	3	4	4	3	3	4	4	4	4	4	4	2	599	1	12	2
4	4	4	3	4	5	4	5	3	4	3	4	4	3	3	4	3	5	4	2	3	2	5	4	5	4	3	4	4	3	2	2	2	496	2	13	2
4	3	4	4	3	3	4	3	4	3	3	4	4	4	3	3	3	4	4	4	4	3	3	4	3	4	3	5	4	3	5	5	5	425	2	13	2
3	4	5	4	4	2	3	5	4	4	3	3	4	3	3	3	3	5	3	4	3	2	5	5	2	5	5	4	4	4	4	5	4	44	2	14	1
4	3	3	4	4	2	4	3	4	4	4	3	3	4	4	3	3	4	4	3	4	3	4	4	3	4	3	4	4	4	4	4	3	201	1	14	1
4	3	4	3	4	3	3	4	4	3	3	3	3	4	4	3	3	5	4	4	4	3	3	4	4	5	4	5	4	3	2	3	4	213	2	15	1
4	3	4	4	3	2	3	4	4	4	3	4	3	4	4	4	4	3	4	3	4	4	4	3	4	3	4	5	3	2	2	2	3	453	2	12	2
4	3	4	4	4	4	2	3	3	3	5	3	3	4	4	3	4	5	3	4	4	4	3	3	4	1	1	1	2	3	1	1	2	58	1	15	1
3	3	4	3	3	3	3	3	4	4	3	3	3	5	5	4	3	3	4	3	3	4	4	4	5	4	5	5	5	3	4	5	3	446	2	12	2
3	3	4	4	4	4	3	4	3	3	3	4	3	4	4	4	2	3	4	4	3	3	4	5	4	3	3	5	2	4	3	4	3	197	1	15	1
3	3	4	4	3	3	4	3	3	4	4	4	3	4	5	3	4	3	3	4	4	3	3	5	4	2	2	2	2	3	2	2	3	11	1	14	1
3	3	4	5	4	3	3	4	4	4	4	4	3	2	4	4	4	5	3	5	4	4	3	4	4	5	3	5	4	4	5	5	5	112	2	14	1
2	2	3	5	3	3	4	4	4	3	3	5	5	3	5	3	4	4	5	3	4	3	4	5	5	4	5	5	3	3	5	5	5	118	1	14	1
3	4	4	4	3	4	3	3	4	3	4	3	3	4	5	4	3	5	4	4	4	4	3	5	5	3	2	3	2	3	2	2	2	262	1	15	1
5	5	5	5	5	4	4	4	3	3	3	3	3	3	3	3	4	5	3	5	5	4	4	4	5	3	2	5	2	2	4	2	2	577	1	13	2
4	5	5	5	5	3	3	4	3	4	4	3	3	3	3	3	3	3	3	1	2	1	1	2	2	4	5	4	4	4	3	5	1	322	1	14	1
3	3	4	4	4	4	4	3	3	3	3	4	3	3	4	4	3	3	3	1	1	2	1	3	2	3	4	5	4	4	5	5	5	251	2	14	1
4	2	4	4	4	4	4	4	4	3	3	4	4	3	4	3	4	4	3	1	1	1	3	3	2	4	4	4	4	4	4	4	4	71	2	14	1
3	3	4	4	4	4	3	5	4	3	4	4	5	3	3	4	4	5	4	2	3	1	2	3	3	4	4	5	4	5	4	4	4	712	1	13	2
4	3	4	4	3	3	3	4	4	4	3	3	3	4	4	3	3	4	3	2	3	2	2	3	2	3	3	4	4	4	4	4	4	216	1	15	1
4	3	4	4	3	3	3	4	4	4	3	3	3	4	4	3	3	4	3	2	3	2	2	3	2	3	3	4	4	4	4	4	4	364	1	15	1
3	2	3	4	4	2	3	4	3	4	2	4	3	3	4	2	4	3	3	3	2	2	3	3	2	4	4	4	4	4	3	3	4	687	1	13	2
4	3	5	3	3	4	4	4	3	3	3	4	4	3	3	4	4	3	3	2	2	2	2	4	3	4	4	4	4	4	4	3	3	710	1	13	2
4	3	3	3	3	3	3	4	4	4	3	3	3	4	4	3	4	4	3	3	3	2	2	3	2	3	2	4	4	3	3	3	2	647	1	14	2
4	3	4	3	3	3	4	4	3	3	3	4	3	3	4	4	2	3	3	3	3	2	2	3	2	5	4	4	5	4	4	5	4	169	2	14	1
3	3	3	3	5	4	4	4	3	2	4	4	4	3	3	4	3	4	3	2	1	2	3	4	3	4	2	4	4	3	4	2	4	646	1	12	2
4	3	4	3	4	3	4	3	3	3	4	4	3	5	4	4	4	3	3	3	3	2	2	3	3	4	5	4	4	3	4	4	1	206	1	14	1
4	3	4	3	3	3	3	4	4	3	3	4	3	3	4	3	3	4	3	2	2	2	3	4	3	3	4	5	4	4	3	2	3	529	2	13	2
3	3	4	4	3	4	3	3	4	3	3	4	4	4	4	4	4	4	4	3	2	2	4	4	2	4	4	5	4	4	4	5	4	220	2	14	1
3	3	4	4	3	4	3	3	4	3	3	4	4	4	4	4	4	4	4	3	2	2	4	4	2	4	4	5	4	4	4	5	4	349	2	14	1
4	3	3	4	4	3	3	4	3	3	4	3	4	4	4	4	3	2	3	3	4	3	3	2	2	4	4	4	4	4	5	5	4	210	2	14	1
3	3	4	4	4	3	4	4	3	3	3	4	4	3	4	3	3	2	3	3	2	2	3	4	3	3	4	3	4	4	3	3	4	214	1	14	1
4	3	4	4	4	3	4	4	3	3	3	3	3	3	3	3	3	3	3	3	3	2	2	4	3	4	5	4	4	4	4	4	4	517	2	12	2
3	3	3	3	4	3	4	4	3	4	3	3	3	3	4	4	3	5	3	3	3	2	2	5	3	4	5	5	5	4	4	5	4	279	2	14	1
3	3	4	4	3	4	3	4	4	3	3	3	3	4	4	3	4	4	4	3	3	3	3	3	3	3	2	3	4	3	2	2	3	460	2	14	2
4	3	4	4	4	4	3	3	3	3	3	4	3	3	4	4	3	3	3	3	3	3	3	3	3	2	3	4	3	3	4	2	5	696	1	13	2
4	3	4	3	4	3	3	4	4	4	3	4	3	2	3	3	3	3	3	3	3	2	3	4	3	5	3	4	4	3	4	4	2	149	2	15	1
4	4	3	4	4	4	3	4	3	3	4	3	3	3	4	3	3	3	4	2	3	3	4	3	3	4	4	4	3	4	4	5	5	500	2	12	2
3	3	3	4	4	4	4	4	4	4	4	3	3	3	3	3	4	3	3	3	3	2	3	4	3	3	2	3	4	4	4	4	3	96	1	15	1
3	3	3	4	4	4	4	4	4	4	4	3	3	3	3	3	4	3	3	3	3	2	3	4	3	3	2	3	4	4	4	4	3	345	1	15	1
4	3	3	4	3	3	4	4	3	4	4	4	3	4	4	3	3	3	4	3	4	3	3	2	3	4	4	4	3	4	4	4	3	406	2	13	2
4	3	4	3	3	4	3	4	4	3	3	3	4	4	3	3	3	4	3	2	2	2	4	3	5	3	3	2	3	2	1	4	2	662	1	14	2
4	4	4	4	4	4	3	4	3	3	4	4	2	4	4	4	4	3	4	2	4	3	3	4	3	3	3	2	3	2	2	2	2	563	1	13	2
3	3	3	3	4	3	4	4	3	4	3	3	3	4	4	3	4	4	4	4	3	3	3	3	3	4	3	4	3	3	3	3	3	537	2	12	2
4	4	4	4	4	3	3	4	3	4	3	4	4	2	3	3	4	3	3	3	3	2	4	4	3	3	4	4	2	4	4	4	2	503	2	12	2
3	3	4	4	4	3	4	3	4	3	3	3	3	4	4	3	3	4	3	3	3	3	3	4	3	5	4	4	4	3	4	4	4	145	2	15	1
3	3	4	4	3	4	3	4	4	3	3	4	3	3	4	3	3	3	4	3	3	2	3	4	4	4	4	4	4	3	4	4	4	641	1	13	2
4	3	3	3	3	4	3	4	3	4	3	3	4	2	3	4	3	3	4	3	4	2	3	4	3	3	4	4	4	3	5	4	4	36	2	14	1
3	3	4	4	3	3	3	3	3	4	4	3	3	4	3	3	3	3	4	3	3	3	2	4	4	5	5	5	4	3	5	4	4	400	2	13	2
4	3	4	3	4	3	3	4	3	3	3	4	3	2	3	3	3	3	3	3	4	3	2	4	3	4	5	5	5	5	5	5	5	421	2	13	2
4	4	3	4	3	3	3	3	3	3	3	4	4	4	4	3	3	3	3	3	4	3	2	4	3	4	3	3	4	3	3	2	3	402	2	12	2
4	3	4	4	3	3	2	4	3	2	4	4	3	4	4	4	4	4	4	3	4	2	3	4	4	4	2	5	4	3	3	5	3	139	2	15	1
3	3	3	4	3	4	3	4	4	3	3	4	4	3	4	4	3	3	3	4	4	3	3	3	3	3	3	4	4	3	3	4	3	159	1	15	1
4	3	4	3	3	4	3	4	3	3	3	3	3	4	4	4	3	2	3	3	4	2	4	4	3	4	5	4	4	3	5	5	3	608	1	12	2
4	3	2	4	4	3	3	3	4	3	4	4	3	4	4	3	4	4	4	4	4	3	3	4	3	1	4	1	3	2	2	4	2	554	1	12	2
3	3	3	4	4	3	4	4	3	3	4	4	3	3	4	3	4	3	3	3	4	3	4	3	4	3	4	3	3	3	4	3	2	512	2	12	2
4	3	4	4	4	3	3	4	3	3	3	4	3	3	4	3	3	4	3	3	4	3	4	4	3	3	3	3	2	3	3	3	2	61	2	15	1
3	3	4	3	4	3	3	3	4	3	4	4	3	4	3	4	3	4	3	3	4	3	3	4	4	4	4	3	3	3	3	3	3	340	1	14	1
3	3	4	3	4	3	3	3	4	3	4	3	4	3	4	3	4	3	3	3	4	3	5	4	4	4	4	4	4	3	4	4	3	120	2	14	1
4	3	4	3	5	3	4	3	3	3	4	4	3	2	4	3	2	3	4	2	1	1	3	4	2	4	2	5	4	4	5	5	3	657	1	14	2
3	3	4	4	2	3	4	4	4	3	3	4	4	4	3	2	3	3	3	3	3	2	2	2	3	3	5	3	5	5	4	3	3	708	1	15	2
2	3	3	4	3	3	3	4	3	4	4	4	4	4	4	3	4	3	3	2	3	2	2	4	3	3	3	4	4	4	4	5	2	606	1	12	2
3	4	4	3	5	3	4	2	3	4	3	3	3	4	4	2	3	2	4	3	2	4	1	2	4	3	2	1	2	4	4	4	2	658	1	13	2
4	4	4	2	4	4	3	2	2	2	2	4	4	4	4	4	3	2	2	3	4	4	2	2	1	4	4	3	4	4	4	4	3	494	2	13	2
4	2	3	3	3	2	2	4	3	4	3	4	3	3	5	4	4	4	3	3	4	2	2	4	2	3	4	4	4	4	4	4	2	468	2	12	2
3	4	4	4	4	3	4	4	2	3	3	4	2	4	3	4	3	4	4	2	3	2	3	4	3	4	4	3	4	4	4	4	2	447	2	13	2
3	3	4	3	3	3	3	4	4	4	3	3	3	3	4	3	3	3	3	3	3	2	3	3	3	4	4	4	4	3	4	5	4	709	1	13	2
4	3	3	3	3	4	2	3	3	2	3	4	2	4	5	2	3	3	4	2	3	2	4	3	3	5	5	5	4	5	5	5	5	390	2	14	2
4	3	4	4	2	3	4	3	4	4	3	4	4	2	3	4	3	4	4	3	2	2	3	4	4	4	4	4	4	3	4	2	2	455	2	13	2
4	3	4	4	4	4	4	3	4	4	2	4	3	2	2	3	4	3	4	3	4	2	2	3	4	4	5	5	4	4	4	5	4	381	2	13	2
3	2	4	4	4	4	3	4	3	3	3	4	3	3	4	3	2	4	2	3	3	2	3	4	3	4	4	5	3	4	5	5	3	154	1	14	1
4	3	3	3	4	3	3	4	3	2	3	4	4	3	4	4	3	3	4	2	3	2	5	4	3	3	2	4	5	3	4	4	2	604	1	12	2
4	3	3	3	3	2	4	4	3	3	3	2	2	2	4	3	2	3	4	3	5	2	3	5	1	4	4	5	5	3	3	5	4	28	2	14	1
2	2	4	3	2	3	2	4	4	3	4	4	4	4	3	3	3	4	4	3	3	3	3	4	3	3	3	4	3	4	2	2	1	564	1	13	2
4	3	4	4	3	4	4	2	3	3	4	4	3	3	3	4	4	2	3	2	3	3	4	4	3	4	4	4	3	4	4	4	3	650	1	12	2
3	3	4	4	4	3	3	4	3	3	3	3	3	4	4	4	3	2	3	2	4	3	2	4	4	4	4	3	4	4	3	3	3	399	2	13	2
3	3	4	4	3	3	3	4	4	3	3	4	4	3	3	4	2	3	3	3	3	3	4	3	3	3	3	4	4	4	5	3	4	498	2	13	2
4	2	3	2	3	4	3	3	4	2	3	4	3	3	4	4	3	3	3	2	4	4	3	3	3	3	5	2	3	5	4	2	4	629	1	13	2
3	3	4	2	4	4	3	3	3	3	3	3	3	3	3	3	3	3	3	3	3	3	3	4	3	3	4	3	2	2	3	2	2	541	2	12	2
3	3	4	3	4	2	3	4	3	3	3	4	3	4	4	4	3	4	3	3	4	3	3	4	3	2	2	3	2	3	3	4	2	174	2	15	1
4	3	3	4	3	3	3	3	3	3	3	4	3	4	3	3	3	3	3	4	4	3	3	3	3	3	3	4	3	4	4	4	4	588	1	13	2
3	4	3	3	4	2	3	2	4	4	4	3	3	3	3	2	2	3	2	3	3	3	3	4	4	5	5	5	4	3	4	4	3	23	2	15	1
3	3	3	4	4	3	4	4	4	3	3	3	3	3	4	4	3	2	3	3	3	3	3	4	4	3	3	3	4	3	3	3	4	294	2	14	1
3	4	3	3	4	1	4	3	2	3	4	4	2	2	5	2	4	2	2	2	5	1	4	5	3	4	5	3	5	3	3	5	1	167	1	14	1
3	3	4	3	3	3	3	5	3	3	4	3	3	4	3	3	2	3	4	3	3	3	4	4	4	3	3	4	4	3	4	4	5	416	2	13	2
3	3	3	3	3	3	4	3	4	3	3	4	4	3	4	4	4	3	3	4	4	3	4	3	3	4	3	4	3	3	3	3	4	633	1	12	2
4	3	3	4	3	3	4	4	3	4	3	4	3	3	3	2	3	4	4	4	3	3	4	4	3	4	4	4	3	3	3	4	4	442	2	13	2
3	3	3	3	4	3	3	3	4	3	3	4	4	3	3	4	3	3	3	3	4	3	3	4	4	3	3	3	3	3	3	3	3	134	2	14	1
4	2	3	4	3	4	3	3	3	2	3	4	4	4	3	4	3	3	3	3	4	4	3	3	4	5	4	5	5	3	2	4	3	190	1	15	1
3	3	4	3	3	3	4	4	3	3	3	3	3	4	4	2	3	2	3	4	4	3	3	4	4	2	2	2	3	3	3	5	4	75	1	14	1
4	3	4	4	3	3	3	4	3	2	3	4	4	4	3	4	4	3	4	3	4	3	4	5	4	2	3	3	2	2	2	3	2	110	2	14	1
3	2	2	3	2	4	2	2	3	2	4	3	3	4	4	3	3	2	3	2	2	2	3	2	2	4	5	5	5	3	3	5	1	571	1	13	2
4	2	4	2	2	4	3	4	3	4	3	4	4	3	2	3	2	2	4	2	2	2	2	3	3	3	4	3	4	1	1	4	3	569	1	13	2
3	3	4	3	3	3	4	3	3	4	3	4	3	3	3	2	3	2	3	1	3	2	3	3	2	3	5	4	3	3	4	3	4	391	2	12	2
3	2	4	4	4	3	4	3	2	3	4	3	4	3	4	3	3	3	4	2	3	2	3	2	3	4	4	4	3	4	4	2	4	659	1	14	2
3	4	3	3	4	3	4	3	4	4	4	2	2	2	2	4	3	2	3	2	3	2	3	3	2	4	5	5	5	3	3	5	5	182	2	15	1
3	2	3	4	3	3	3	4	3	3	3	3	4	4	3	3	3	3	3	3	3	2	3	2	2	4	3	5	4	4	5	5	4	475	2	13	2
3	3	3	4	4	3	3	3	4	3	3	4	3	3	4	3	3	3	3	2	2	2	2	4	3	3	3	3	3	3	3	3	3	196	2	14	1
3	3	3	4	4	3	3	3	4	3	3	4	3	3	4	3	3	3	3	2	2	2	2	4	3	3	3	3	3	3	3	3	3	348	2	14	1
3	3	4	3	3	2	3	3	4	3	2	4	3	4	5	3	3	3	4	3	2	2	3	3	3	4	3	3	4	3	4	3	2	682	1	13	2
4	4	4	4	4	4	3	3	2	3	2	4	3	2	4	4	3	4	3	3	2	1	3	4	3	2	4	2	2	2	2	4	4	137	1	15	1
4	4	4	4	3	3	3	4	4	4	3	3	3	2	2	3	3	3	3	1	1	1	5	5	3	3	3	5	3	3	4	3	1	471	2	13	2
3	3	3	3	2	3	4	4	4	3	3	4	3	3	4	4	3	2	3	2	2	2	3	4	3	3	4	4	2	4	3	5	4	582	1	14	2
4	4	5	4	3	3	2	4	3	3	4	3	3	3	4	4	4	3	3	4	3	1	2	5	1	3	3	5	3	3	4	4	5	88	1	15	1
2	2	2	4	3	3	4	4	3	4	4	4	4	3	4	2	4	3	3	3	3	2	3	4	2	4	5	5	4	4	4	5	3	56	1	15	1
4	3	4	3	4	3	3	3	3	4	3	4	2	2	4	2	3	2	3	2	2	1	5	3	4	3	4	5	3	4	2	3	3	34	2	14	1
4	4	4	3	3	4	4	4	3	2	3	3	2	3	3	4	4	4	3	2	3	3	4	4	2	4	3	4	4	3	4	4	3	666	1	13	2
3	3	3	4	3	3	2	3	3	3	4	2	3	4	3	4	3	2	3	2	3	2	3	5	3	4	5	5	3	4	5	4	1	189	2	14	1
3	3	3	4	3	3	2	3	3	3	4	2	3	4	3	4	3	2	3	2	3	2	3	5	3	4	5	5	3	4	5	4	1	316	1	14	1
3	3	4	4	3	3	2	3	3	3	4	2	3	4	3	4	3	2	3	2	3	2	3	5	3	4	5	5	3	4	5	4	1	326	2	14	1
3	2	4	4	4	3	3	4	2	2	3	4	4	4	4	3	3	4	3	2	4	3	2	4	3	4	4	4	4	4	3	5	4	50	2	14	1
4	3	4	4	3	3	3	3	3	4	3	4	3	3	3	3	2	4	4	3	3	2	4	3	3	4	5	5	4	4	5	4	3	208	2	14	1
4	3	3	3	4	3	3	4	3	4	3	3	3	3	3	4	3	4	3	3	3	3	4	3	3	4	5	5	4	3	5	5	5	217	2	14	1
3	3	4	3	3	3	3	4	4	3	3	3	3	3	4	4	2	3	4	3	3	3	3	4	3	4	3	4	4	3	4	4	3	138	2	14	1
3	3	4	3	4	3	3	3	4	3	3	4	3	3	3	3	2	4	4	3	3	2	3	4	4	3	2	4	3	4	3	4	4	200	2	14	1
4	3	3	4	4	4	2	3	4	3	4	3	2	2	3	3	3	2	3	2	3	3	3	4	4	3	5	2	4	3	3	2	5	147	1	14	1
3	3	3	4	2	4	5	3	3	3	2	4	3	3	4	3	3	4	3	5	3	2	3	3	3	4	4	5	5	4	2	5	4	25	1	14	1
4	3	3	3	3	3	3	4	3	4	3	4	3	3	3	3	3	4	3	3	3	3	4	4	3	3	4	4	4	4	4	5	3	492	2	13	2
3	4	4	4	4	3	4	4	3	3	4	2	4	4	2	2	3	3	2	3	3	4	3	4	3	2	5	3	3	3	3	4	2	223	1	15	1
3	3	3	4	3	2	3	4	4	3	3	4	4	3	4	3	3	3	4	3	4	4	3	3	4	3	3	3	4	3	4	4	4	670	1	14	2
4	4	4	4	4	4	2	2	2	2	4	4	2	4	4	4	4	4	4	3	4	4	4	3	4	4	2	2	3	4	2	3	4	238	1	14	1
3	3	4	3	3	3	3	4	4	3	3	3	3	4	3	3	3	2	3	4	4	3	5	4	3	5	5	5	4	4	5	5	5	266	2	15	1
4	2	2	3	4	4	2	3	2	4	3	4	4	4	4	4	4	4	4	2	3	1	2	3	2	4	4	3	4	4	4	4	3	557	1	13	2
2	2	4	3	3	3	3	4	3	3	4	4	4	3	3	3	3	4	2	3	3	2	2	2	2	4	4	4	4	4	4	4	4	491	2	13	2
4	3	2	4	4	3	3	4	3	3	3	3	4	3	3	3	3	2	4	3	3	2	2	3	2	4	4	4	4	4	4	4	3	638	1	13	2
3	2	4	3	3	3	3	3	4	3	3	3	3	4	4	4	3	4	3	2	3	3	3	3	2	3	3	4	4	3	3	3	3	544	2	13	2
3	3	3	5	3	4	3	3	3	4	4	3	3	3	3	4	4	3	4	3	3	2	3	3	3	4	4	3	4	3	4	4	3	684	1	12	2
3	3	3	4	3	3	3	3	3	3	4	3	4	3	4	3	3	3	3	3	2	2	3	4	3	4	5	4	5	3	5	5	3	671	1	13	2
3	3	4	4	3	3	3	2	3	4	3	3	3	4	4	3	2	2	3	3	3	3	3	3	2	3	3	4	3	3	3	2	2	611	1	12	2
4	3	3	4	3	3	4	3	3	3	3	4	4	2	3	4	4	4	3	3	3	2	2	4	4	3	4	5	3	3	4	4	5	482	2	13	2
3	3	4	4	3	3	3	4	4	3	3	3	3	3	3	4	4	4	3	3	3	2	3	4	3	4	5	4	5	3	4	4	4	636	1	13	2
2	3	4	3	3	2	3	3	4	4	3	4	4	3	3	3	4	4	3	3	3	2	4	3	3	3	2	2	4	3	3	2	2	428	2	13	2
4	2	2	4	4	3	3	2	2	4	3	4	3	3	4	3	3	4	3	3	4	3	3	4	2	4	4	3	4	4	4	4	3	184	1	14	1
3	3	4	4	4	4	3	3	3	4	2	2	3	3	4	4	3	3	4	3	3	3	4	4	2	4	3	4	3	4	3	4	2	520	2	13	2
3	3	4	3	3	3	4	3	4	3	3	3	3	3	3	3	3	3	3	3	3	3	3	4	3	3	2	3	4	3	3	3	3	440	2	13	2
5	3	4	4	2	3	2	3	2	4	3	4	5	3	4	3	4	3	4	3	3	2	2	4	5	4	5	5	5	4	4	5	2	631	1	12	2
3	2	3	3	3	4	3	3	4	4	3	3	3	4	3	3	3	4	3	3	4	3	4	4	3	3	2	2	4	3	2	2	2	653	1	13	2
3	3	4	3	2	2	3	4	3	3	2	4	4	4	4	3	3	3	3	4	4	3	2	5	4	3	4	5	3	5	4	5	4	77	2	15	1
3	2	4	3	4	2	3	3	3	4	4	3	3	2	3	2	4	3	3	3	4	3	3	5	4	4	5	3	4	3	2	3	2	247	1	15	1
3	2	4	4	3	3	4	3	4	3	3	2	4	3	4	2	4	2	3	4	4	3	4	4	3	3	4	3	2	4	4	5	5	472	2	12	2
3	3	3	3	3	3	3	3	3	3	3	3	4	4	4	4	4	4	4	4	4	4	4	4	4	4	4	4	3	3	3	3	3	372	2	15	1
3	3	3	3	3	3	3	4	3	3	4	3	3	3	3	4	3	2	4	1	2	2	2	3	2	4	5	4	4	4	4	4	3	593	1	12	2
3	3	3	3	2	3	4	4	4	3	2	4	2	4	3	3	3	3	3	2	2	2	2	2	2	3	3	4	4	4	4	4	4	720	1	13	2
4	4	3	4	3	3	4	4	3	3	3	3	2	2	3	4	3	3	3	2	2	2	2	4	1	3	5	5	3	4	4	4	4	312	2	14	1
4	3	2	3	3	4	2	3	4	3	3	3	4	3	3	3	4	3	3	1	2	1	3	4	2	4	3	2	3	3	3	4	4	565	1	13	2
3	2	3	2	3	4	4	3	3	4	2	4	3	3	3	4	3	4	2	3	3	1	2	3	2	2	4	4	2	3	3	3	1	91	1	14	1
4	4	2	3	4	3	3	4	3	4	4	3	3	2	3	2	3	2	3	1	3	2	4	2	2	4	4	4	4	4	2	3	3	392	2	13	2
3	3	4	3	4	3	2	4	3	2	3	3	2	4	4	3	2	3	3	2	3	3	2	3	1	5	5	5	4	3	5	5	2	536	2	13	2
4	3	4	4	2	2	3	2	3	3	4	4	3	3	4	4	3	3	4	3	3	2	3	2	2	4	3	3	4	4	3	1	1	602	1	12	2
3	4	3	4	2	2	2	4	2	2	4	4	2	4	4	4	2	4	4	3	2	2	2	4	2	5	4	2	4	4	2	2	2	292	1	14	1
4	3	4	3	3	3	3	4	3	3	3	3	3	2	3	3	3	2	3	2	2	2	2	4	3	4	3	4	3	4	4	3	4	93	2	15	1
5	4	4	3	3	3	3	4	4	4	3	2	3	3	3	3	3	3	3	5	3	2	1	3	3	3	3	5	3	5	5	5	5	273	1	15	1
4	3	3	4	3	4	4	3	3	3	3	2	3	2	2	2	2	3	4	2	3	2	4	3	3	4	4	4	3	3	4	4	4	254	1	15	1
3	3	4	4	3	2	3	3	4	3	4	3	3	3	3	4	2	2	2	2	2	3	3	4	3	4	4	3	3	4	2	2	2	131	1	15	1
2	2	3	3	4	4	4	4	4	4	2	4	4	4	2	4	4	5	3	3	3	3	2	4	3	4	4	4	3	4	4	5	5	98	2	14	1
3	3	3	3	3	3	3	3	3	3	3	3	3	4	4	3	3	3	3	3	3	3	3	3	3	3	3	3	2	3	3	3	3	723	1	14	2
3	3	3	4	3	3	3	4	3	3	4	3	3	3	3	3	2	2	3	3	3	3	3	3	3	3	4	5	3	4	4	5	4	411	2	13	2
4	4	4	4	4	2	3	4	4	4	2	2	2	2	3	3	4	4	4	3	3	3	3	3	4	3	4	4	2	4	2	4	4	95	1	14	1
3	3	3	4	4	3	4	3	3	3	3	3	3	3	3	4	3	4	3	3	3	3	3	4	3	4	4	5	4	3	4	4	4	253	2	14	1
3	2	4	4	3	4	3	3	4	3	3	4	4	2	2	4	3	2	4	3	4	3	2	3	4	3	4	4	4	4	4	4	4	478	2	13	2
3	2	4	3	4	4	3	4	3	3	4	3	2	2	3	4	2	2	3	3	4	2	4	4	3	4	4	5	4	3	5	5	5	276	2	14	1
3	3	3	3	3	4	3	3	3	3	3	3	3	4	3	3	3	3	3	3	4	3	4	3	3	3	2	3	2	2	4	4	4	718	1	12	2
4	4	4	3	3	4	3	4	3	2	3	3	2	2	3	3	3	3	3	4	4	3	3	4	3	4	2	4	4	4	5	5	4	622	1	13	2
3	2	4	4	3	3	2	4	2	3	2	4	4	3	3	3	4	4	3	3	4	2	3	4	5	4	5	5	4	4	5	5	3	663	1	13	2
4	3	4	3	3	3	3	3	3	3	3	3	3	3	3	3	3	3	3	3	3	2	4	5	4	4	5	5	4	3	5	3	2	341	1	15	1
4	3	4	4	3	3	3	3	3	3	3	3	3	3	3	3	3	3	3	4	4	3	3	4	3	3	4	3	4	4	4	4	4	540	2	13	2
4	3	3	4	3	3	3	3	3	3	3	3	3	4	3	3	3	3	3	4	4	4	3	3	3	3	4	3	3	3	3	3	3	82	1	15	1
4	3	3	4	3	3	3	3	3	3	3	3	3	4	3	3	3	3	3	4	4	4	3	3	3	3	4	3	3	3	3	3	3	343	1	15	1
3	3	4	4	4	3	3	2	2	3	4	3	4	2	4	3	2	2	3	3	4	2	4	5	4	4	5	5	4	4	3	5	3	59	1	14	1
3	2	2	3	4	4	4	3	4	3	4	2	4	3	2	2	4	3	3	4	4	4	4	3	3	3	2	3	3	4	3	4	3	231	1	15	1
4	4	3	3	3	3	3	3	3	3	3	3	3	3	3	3	3	3	3	4	4	3	4	4	4	1	2	4	2	3	2	1	1	319	1	14	1
3	3	3	4	3	3	3	3	3	3	3	3	5	3	3	3	3	3	3	5	5	5	5	4	4	1	1	1	1	1	1	1	1	35	1	14	1
4	3	3	4	3	2	3	3	4	4	3	4	4	2	3	2	2	3	4	1	2	2	1	3	1	3	5	1	3	2	5	2	4	660	1	13	2
3	3	2	4	4	3	4	3	4	3	3	4	3	2	3	4	3	3	3	3	2	1	2	2	1	3	5	3	3	4	4	3	3	313	1	14	1
4	2	3	3	3	3	2	4	4	3	3	2	3	2	4	4	3	4	3	2	3	2	1	3	2	3	5	4	5	5	4	4	3	148	2	15	1
3	2	3	4	3	3	4	4	4	3	3	3	2	2	2	2	4	2	3	1	3	2	2	4	2	3	4	4	3	5	4	4	4	94	2	15	1
2	2	2	4	3	3	4	3	4	4	4	3	3	3	3	4	2	2	4	3	3	2	2	3	2	4	4	3	4	3	4	3	2	628	1	14	2
3	2	3	3	3	3	2	3	3	3	2	4	3	4	3	3	3	4	4	3	3	2	3	2	3	3	4	5	4	4	5	5	5	461	2	13	2
4	4	4	3	4	2	2	3	2	3	2	4	2	4	3	4	2	3	3	3	3	2	2	3	3	4	2	5	5	3	4	5	2	389	2	12	2
4	3	3	3	3	3	2	3	2	3	3	3	4	3	4	3	3	2	3	2	3	3	3	3	3	3	3	5	4	2	3	4	3	558	1	13	2
4	3	4	4	3	3	2	3	3	2	4	4	3	2	3	3	4	4	3	3	2	3	2	4	3	4	4	4	3	3	3	4	2	432	2	12	2
2	2	4	4	3	3	3	3	3	3	3	4	3	4	3	3	3	4	3	3	3	3	3	3	2	3	3	4	4	4	4	4	3	596	1	13	2
3	3	4	4	3	4	3	2	4	3	3	4	3	2	3	2	3	3	3	3	3	2	3	3	3	5	4	4	3	5	5	5	5	31	1	14	1
2	2	4	4	3	2	2	4	4	3	4	3	4	4	2	4	2	4	3	2	4	2	3	4	3	3	2	4	4	4	4	4	2	511	2	12	2
3	3	3	4	3	3	3	3	3	3	3	4	3	3	3	3	3	3	3	3	3	3	3	3	3	4	3	3	5	3	3	5	5	375	1	14	1
3	3	3	3	3	3	3	3	3	4	3	3	3	3	3	3	3	3	3	3	3	3	3	3	3	3	3	3	3	3	4	4	4	725	1	12	2
3	3	3	4	3	3	3	4	3	4	4	2	2	3	3	3	2	3	3	3	4	2	4	3	3	4	5	3	4	4	3	4	3	688	1	13	2
3	3	4	3	3	2	2	3	2	2	3	4	3	4	3	3	3	4	4	3	4	4	4	4	3	4	4	4	3	3	4	4	4	452	2	12	2
3	4	3	4	4	3	3	2	2	2	3	2	3	4	2	2	3	2	2	5	5	5	4	3	5	2	3	3	3	3	2	2	4	115	1	14	1
4	2	4	4	4	2	4	4	3	3	2	3	3	2	2	2	3	4	3	2	2	2	2	2	2	4	4	4	4	4	4	4	4	534	2	13	2
2	2	3	4	3	3	3	4	3	4	4	4	3	2	2	4	3	2	3	2	2	1	2	2	3	4	4	5	3	4	4	4	4	693	1	12	2
4	3	3	3	2	2	2	3	2	2	3	3	3	3	3	4	3	3	4	1	1	1	1	5	5	4	5	5	5	5	5	5	5	281	1	15	1
3	2	4	3	3	3	3	3	3	3	3	3	3	3	3	3	3	3	3	3	2	2	2	4	2	3	4	4	2	4	2	4	4	547	2	12	2
3	3	4	3	3	2	2	4	2	3	3	4	2	3	4	3	4	2	4	2	3	1	3	3	4	3	4	4	2	4	3	3	3	607	1	13	2
3	3	3	3	3	3	3	3	3	3	3	3	3	3	3	3	3	3	3	3	3	3	3	2	2	3	3	3	3	3	3	3	2	550	2	12	2
3	3	3	3	3	3	3	3	3	3	3	3	3	3	3	3	3	3	3	1	3	1	4	5	2	3	3	3	3	3	3	3	3	315	1	14	1
4	3	3	3	4	3	2	3	4	3	2	4	3	2	2	4	4	3	3	2	3	3	3	3	3	4	3	2	4	3	2	3	2	528	2	13	2
3	3	3	3	3	3	3	3	3	3	3	3	3	3	3	3	3	3	3	3	4	2	2	3	3	3	4	4	5	5	4	4	3	542	2	13	2
3	3	3	3	3	3	3	3	3	3	3	3	3	3	3	3	4	3	4	3	3	3	3	3	3	3	4	4	3	3	4	3	3	722	1	13	2
3	3	3	4	3	3	3	3	3	3	3	3	3	3	3	3	3	3	3	3	3	3	3	3	3	3	3	3	3	3	3	3	3	335	2	14	1
3	3	3	3	3	3	3	3	3	3	3	3	3	3	3	3	3	3	3	3	3	3	3	3	3	3	3	3	3	3	3	3	3	545	2	13	2
3	3	3	3	3	3	3	3	3	4	3	3	3	2	3	3	3	3	3	3	3	3	3	3	3	3	4	5	3	4	2	3	3	728	1	13	2
3	3	3	3	3	3	3	3	3	3	3	3	3	3	3	3	3	3	3	3	3	3	3	3	3	3	3	3	3	3	3	3	3	323	1	15	1
3	3	3	3	3	3	3	3	3	3	3	3	3	3	3	3	3	3	3	3	3	3	3	3	3	3	3	3	3	3	3	3	3	331	2	15	1
3	3	3	3	3	3	3	3	3	3	3	3	3	3	3	3	3	3	3	3	3	3	2	4	3	4	3	3	4	4	3	3	3	374	1	15	1
4	5	3	3	2	2	3	2	4	3	3	2	2	3	4	2	2	2	3	3	2	4	3	3	3	4	4	3	4	4	4	1	5	702	1	14	2
4	3	4	4	4	3	3	4	3	2	2	2	2	3	3	3	4	4	4	3	3	2	3	4	4	4	4	4	4	3	4	4	4	678	1	13	2
2	3	4	4	4	3	2	3	2	3	4	4	4	2	3	3	4	3	3	2	4	4	4	3	2	4	2	3	4	3	3	4	2	605	1	13	2
3	3	3	3	3	3	3	3	3	3	3	3	3	3	3	3	3	3	3	3	3	3	3	4	3	3	4	4	4	4	3	3	3	642	1	13	2
5	3	3	4	3	3	2	2	4	4	2	2	2	3	3	2	4	3	2	1	3	3	2	5	5	4	4	5	5	3	2	4	5	635	1	12	2
3	3	3	3	3	3	3	3	4	3	2	3	4	2	4	3	2	3	4	3	4	3	3	4	3	4	4	5	3	4	4	4	3	155	2	14	1
4	2	3	3	3	2	3	4	3	3	2	3	3	4	3	4	2	2	4	3	4	2	4	4	4	3	4	5	2	5	5	5	5	581	1	13	2
4	3	4	3	4	2	2	2	3	3	3	4	4	2	2	3	2	2	2	2	4	3	3	5	4	3	5	5	2	4	4	3	1	150	1	14	1
3	4	2	3	4	2	2	3	4	3	2	3	4	3	4	4	4	3	3	5	4	2	4	3	4	3	3	5	2	4	4	3	2	697	1	12	2
3	3	3	3	3	3	3	3	3	3	3	3	3	3	3	3	3	3	3	3	4	4	3	4	4	3	2	5	2	3	2	1	2	320	1	14	1
3	3	3	3	3	3	3	3	3	3	3	3	3	3	3	3	3	3	3	4	4	3	4	5	3	3	3	3	3	3	3	3	3	317	1	15	1
3	2	3	2	3	4	2	3	2	3	2	3	3	3	4	4	4	3	3	2	3	2	2	2	3	3	4	5	3	5	4	5	4	509	2	13	2
3	2	4	2	3	4	3	2	2	3	4	2	2	2	3	2	3	3	2	3	3	2	2	2	2	3	2	5	5	2	2	2	4	721	1	12	2
3	3	3	2	3	3	3	3	3	4	2	3	2	3	3	2	3	4	3	3	2	2	2	3	3	4	5	5	4	5	5	4	2	424	2	12	2
2	3	3	4	4	3	2	3	3	2	3	3	4	2	4	4	2	3	3	3	1	1	2	4	4	3	4	1	4	2	4	4	4	296	2	15	1
3	3	3	3	3	3	3	3	3	3	2	3	3	3	3	3	3	3	3	3	2	2	2	3	3	3	2	3	3	3	3	3	3	546	2	13	2
3	3	3	4	3	2	3	4	3	2	4	2	3	3	3	4	2	3	3	2	4	1	3	4	2	4	3	5	5	5	4	5	3	524	2	13	2
2	3	3	4	4	2	3	2	3	2	3	2	2	3	2	4	2	2	3	2	3	1	3	4	3	5	4	5	4	3	4	5	3	99	2	15	1
4	2	2	4	4	2	3	4	2	3	3	3	2	4	3	2	4	3	2	3	2	2	2	4	3	4	5	5	4	5	3	3	4	156	2	15	1
3	3	4	3	4	2	2	3	2	3	2	4	2	4	3	4	2	2	2	3	3	2	2	3	3	3	3	3	3	4	4	4	2	384	2	13	2
3	3	4	3	3	3	3	2	3	3	3	3	2	3	3	2	3	3	2	3	2	2	3	3	3	3	3	4	4	4	4	4	3	533	2	12	2
3	2	2	3	3	3	3	4	3	2	3	4	3	3	3	2	2	2	3	3	3	2	3	4	2	4	5	4	5	4	5	5	5	560	1	13	2
3	3	4	4	3	4	2	3	3	2	2	3	2	4	3	4	2	4	3	3	4	2	2	4	3	4	4	3	4	4	4	3	2	415	2	13	2
4	3	4	4	3	2	3	2	3	4	3	2	3	3	2	3	3	2	3	3	4	3	4	3	2	5	4	3	4	5	5	4	4	618	1	13	2
2	2	4	4	3	2	4	3	3	4	3	2	3	3	3	4	2	2	3	3	4	2	3	4	3	3	4	4	4	4	4	3	4	690	1	12	2
3	3	3	4	3	3	2	2	4	3	4	2	4	3	2	2	4	3	3	4	4	3	4	4	4	2	3	1	1	2	1	3	1	74	1	15	1
2	2	3	3	3	4	3	2	3	2	3	3	4	3	2	3	3	4	3	4	3	3	4	5	4	5	3	5	5	3	5	3	4	330	1	14	1
2	2	2	4	4	4	2	2	4	4	2	2	2	4	4	4	4	4	4	2	2	2	2	2	2	4	4	5	4	4	4	4	2	530	2	13	2
3	2	4	4	4	3	2	3	3	2	4	4	2	3	3	4	3	3	4	1	3	2	1	3	2	5	5	5	3	5	5	5	5	304	2	15	1
2	2	3	4	3	3	3	3	3	3	3	3	3	2	4	4	3	4	4	2	3	1	2	3	2	3	4	5	4	4	3	4	4	142	2	14	1
3	2	3	4	3	2	3	2	3	3	2	4	3	2	3	3	3	4	4	2	1	1	3	4	4	3	2	3	5	5	2	2	3	715	1	14	2
3	2	4	4	3	3	3	3	3	2	3	4	3	3	2	3	3	3	3	3	2	2	2	4	2	4	1	2	3	4	4	1	5	122	2	14	1
3	3	4	3	4	4	3	3	3	3	3	2	3	2	2	2	2	2	3	2	3	1	2	4	3	5	5	5	5	4	5	5	3	385	2	13	2
3	3	3	4	2	3	2	4	3	3	3	3	2	3	3	3	3	2	3	2	2	1	3	5	2	4	5	5	5	5	5	5	5	583	1	12	2
2	3	4	3	4	3	3	4	3	3	3	2	2	2	2	3	2	2	4	3	3	3	3	3	3	3	3	5	5	4	4	4	4	731	1	12	2
3	3	3	2	2	3	3	2	3	2	3	3	4	2	4	4	3	2	2	2	3	3	2	4	4	3	3	4	4	3	4	4	3	649	1	14	2
4	3	4	4	3	3	3	2	2	3	3	2	3	4	3	4	3	4	3	3	3	3	4	4	3	4	5	5	4	5	5	5	4	594	1	12	2
3	3	4	3	3	3	3	3	2	3	3	3	2	2	3	3	3	2	3	3	3	3	4	4	3	3	3	4	3	4	4	4	4	504	2	13	2
3	3	4	3	3	3	2	3	3	4	2	3	3	2	2	3	3	3	3	1	3	1	3	3	1	3	5	5	5	3	3	3	5	614	1	13	2
4	4	3	4	3	2	2	2	3	2	4	2	3	3	2	2	3	3	2	1	3	3	1	2	2	4	4	4	3	3	3	3	2	207	1	14	1
2	2	4	4	3	4	4	3	3	2	3	2	2	3	2	3	2	2	3	1	4	1	3	2	2	4	3	4	3	4	2	4	4	62	2	14	1
3	2	4	3	3	2	3	3	3	3	2	3	3	2	3	3	2	4	4	2	2	2	2	4	2	5	5	4	4	5	1	5	5	92	2	14	1
3	3	4	3	3	3	3	2	4	2	4	3	2	1	2	2	4	3	2	2	2	2	3	4	2	3	3	4	4	4	4	2	2	567	1	12	2
2	2	3	3	4	3	2	2	2	2	3	4	4	3	3	2	3	3	3	2	3	2	4	3	2	3	4	3	4	4	2	3	3	651	1	14	2
2	3	4	3	3	3	3	2	3	3	3	2	2	3	3	2	3	2	2	3	3	2	3	2	3	4	4	4	3	4	4	4	4	408	2	13	2
3	3	2	4	3	3	3	3	3	2	3	3	3	3	2	2	2	2	2	3	3	2	3	3	2	4	3	3	4	4	4	3	3	621	1	13	2
3	2	4	4	3	2	3	2	4	2	2	3	3	2	4	4	2	2	4	2	2	3	3	3	4	4	4	5	4	4	3	4	4	502	2	13	2
3	2	3	4	3	3	4	4	3	2	3	4	2	1	2	3	3	1	4	3	4	2	3	3	2	4	5	3	5	4	4	4	3	623	1	12	2
3	3	4	4	3	3	3	3	3	3	3	2	2	2	2	2	3	2	2	2	3	1	4	4	3	4	4	4	4	4	4	4	2	559	1	13	2
3	2	2	3	1	3	3	3	3	2	2	4	4	3	4	1	4	1	3	3	3	3	3	3	2	4	4	4	5	4	4	4	4	683	1	12	2
3	3	4	4	3	4	3	4	3	2	2	3	3	1	1	1	3	4	4	2	3	2	3	5	3	4	5	5	4	4	4	5	3	314	2	15	1
3	3	4	4	4	2	2	3	2	3	2	2	2	3	4	2	3	2	2	3	3	2	3	4	3	4	4	4	4	3	4	4	4	249	2	15	1
2	2	3	4	3	2	3	2	3	3	3	3	3	3	4	4	3	2	3	3	3	3	3	3	4	3	3	2	4	4	3	4	4	370	2	14	1
2	3	2	3	2	3	3	3	2	4	4	2	3	3	3	4	4	3	2	3	3	3	4	4	3	4	2	3	4	4	3	4	4	513	2	13	2
2	2	2	3	4	2	4	2	4	4	2	3	2	3	2	4	2	4	3	1	2	1	1	2	2	4	4	4	4	5	4	4	4	307	2	14	1
4	3	4	4	1	1	1	1	3	4	2	3	3	2	4	1	2	3	3	1	1	1	1	3	2	4	3	4	4	5	5	5	5	539	2	12	2
3	3	4	4	3	1	1	4	5	3	2	3	1	1	3	2	2	1	3	1	1	1	1	5	1	5	5	5	5	5	5	5	5	422	2	13	2
4	2	3	4	3	3	3	3	3	3	3	2	2	2	2	3	3	3	2	1	3	2	1	2	2	3	3	3	3	4	3	4	3	85	2	15	1
2	2	2	3	2	2	3	4	5	4	3	2	2	2	3	2	2	3	4	2	2	2	2	2	2	3	3	3	4	3	3	2	3	556	1	13	2
2	3	3	4	2	2	1	3	4	4	3	3	1	2	2	2	1	3	4	2	2	1	2	3	3	4	5	5	4	5	1	5	3	566	1	13	2
3	2	4	4	2	2	3	3	3	2	4	3	2	2	3	2	3	3	2	2	2	2	2	3	4	4	4	4	4	4	3	3	4	463	2	13	2
1	2	2	3	4	2	3	2	4	3	2	2	4	1	3	2	3	2	3	2	2	3	1	3	5	3	4	2	5	5	4	2	1	674	1	13	2
2	3	4	4	2	3	2	2	3	3	3	2	2	3	4	3	4	4	3	3	3	3	2	2	3	3	4	5	4	4	3	3	3	726	1	13	2
3	3	2	2	3	2	2	2	3	2	3	4	4	2	3	2	3	2	4	3	2	2	3	3	3	4	3	5	3	3	4	4	3	686	1	12	2
2	2	2	4	3	4	3	4	4	3	3	2	2	2	2	2	4	4	4	3	3	2	3	3	3	4	4	4	4	4	4	5	2	570	1	14	2
2	2	3	3	3	3	4	3	3	2	2	2	2	4	3	3	2	1	3	3	4	3	3	3	2	4	2	3	5	4	3	4	3	203	1	14	1
3	2	3	3	3	3	2	2	2	3	4	3	2	3	3	4	3	2	3	3	2	3	4	4	3	4	5	4	4	3	4	4	5	680	1	13	2
4	3	3	4	3	2	2	3	2	2	3	3	1	4	3	2	4	1	3	3	3	2	2	5	5	3	3	3	3	3	4	4	4	589	1	13	2
3	3	4	3	3	3	3	2	2	2	3	2	2	2	3	3	3	2	3	2	2	2	3	4	2	4	4	4	4	4	4	4	4	531	2	12	2
2	1	2	3	3	2	3	3	3	3	2	3	3	4	3	3	3	3	3	3	2	2	2	4	3	3	4	4	3	5	3	3	3	532	2	12	2
2	2	3	3	2	3	2	3	4	3	2	3	3	2	2	3	3	2	2	3	3	2	4	3	2	4	4	4	4	4	3	2	4	507	2	13	2
3	3	2	3	2	2	2	3	2	3	3	3	3	3	2	4	3	2	3	2	4	2	3	4	4	3	2	4	4	4	2	3	2	515	2	13	2
3	3	3	3	3	3	2	3	3	3	3	2	2	1	3	2	3	1	3	3	3	3	3	4	4	4	5	4	3	3	3	3	2	310	1	15	1
3	2	1	3	2	3	3	2	3	3	2	2	3	1	3	1	1	2	3	1	1	1	1	5	1	4	5	5	5	5	1	3	5	627	1	14	2
1	3	3	2	3	3	3	2	3	3	1	3	3	1	1	3	3	1	3	1	2	1	1	5	3	3	3	5	5	5	5	5	5	33	2	15	1
4	3	3	2	3	3	3	3	2	2	2	2	3	1	1	3	3	3	1	2	3	2	3	2	2	4	5	5	5	5	5	5	5	180	1	15	1
3	2	2	3	3	2	2	3	3	2	1	3	3	4	3	3	4	1	3	3	2	2	2	3	2	3	4	4	2	4	3	4	3	523	2	13	2
3	2	2	3	3	2	3	3	2	2	3	2	3	3	3	2	2	2	3	3	2	2	2	2	3	3	4	4	3	4	2	2	4	643	1	13	2
4	2	3	3	3	3	3	2	2	2	3	3	2	2	2	2	2	4	2	3	2	1	3	3	3	3	4	4	3	4	4	4	3	535	2	12	2
2	2	3	2	2	2	2	2	3	2	3	3	2	3	3	3	3	3	3	2	3	2	3	4	2	3	3	4	2	4	3	4	3	639	1	14	2
3	3	3	3	3	1	1	2	2	2	2	3	2	3	3	3	2	3	1	2	4	2	3	3	3	4	4	5	5	5	5	5	5	79	2	14	1
3	3	4	2	3	2	3	2	2	2	3	3	2	1	2	3	1	2	4	3	3	2	2	4	3	4	4	5	3	5	5	4	4	90	2	14	1
3	3	3	3	2	2	2	2	3	2	3	2	3	3	3	3	3	3	2	2	3	3	3	3	3	3	3	3	3	3	3	3	3	736	1	14	2
3	3	3	3	2	2	2	2	3	2	3	3	3	2	3	3	2	2	4	2	3	3	3	3	3	3	3	3	3	3	3	3	3	738	1	13	2
2	2	3	2	4	3	2	2	2	2	3	3	3	2	2	2	2	2	2	3	3	2	4	4	2	3	4	4	3	4	4	5	4	694	1	13	2
3	3	2	2	3	3	3	3	2	2	2	2	3	2	3	3	3	1	3	3	4	3	3	3	3	4	4	3	3	3	3	5	4	598	1	12	2
3	1	3	3	3	2	3	3	3	2	3	2	2	1	1	1	3	3	3	1	2	1	2	1	1	4	5	5	5	5	5	3	4	527	2	13	2
3	2	3	2	2	2	2	3	3	2	2	3	2	3	3	2	2	3	3	2	2	2	3	3	2	3	4	4	3	5	4	3	3	717	1	13	2
2	3	2	3	3	2	2	3	2	2	1	2	3	1	3	2	2	1	3	2	3	2	1	4	2	4	5	5	3	4	5	5	5	677	1	13	2
3	2	3	3	3	2	2	2	2	2	3	2	2	2	4	3	2	2	2	2	3	2	3	2	2	4	3	4	4	4	4	2	3	64	1	15	1
3	3	2	3	3	1	2	3	2	2	1	2	3	1	3	2	3	2	1	2	2	1	2	3	4	3	2	3	5	3	4	1	3	673	1	14	2
2	2	3	3	2	2	3	2	2	3	3	2	3	2	2	3	4	3	3	2	2	3	3	2	3	2	4	4	3	3	4	4	2	516	2	12	2
3	2	2	3	3	2	3	2	3	2	3	3	2	2	3	3	2	2	3	3	3	2	2	3	2	3	4	4	3	4	4	2	3	518	2	13	2
2	2	2	3	3	3	2	2	2	3	2	3	3	3	3	2	3	2	3	3	3	3	2	3	2	4	4	4	4	4	3	4	3	579	1	13	2
3	3	2	2	3	3	2	2	3	2	2	2	2	2	2	3	2	3	3	3	3	2	3	5	2	4	4	4	4	4	3	4	3	714	1	13	2
1	1	1	1	3	3	1	3	3	3	3	2	1	3	3	3	3	3	3	3	3	3	3	3	3	3	3	3	3	3	3	3	3	737	1	13	2
3	2	2	3	2	2	3	3	3	2	2	2	2	3	3	3	3	2	3	2	2	1	3	2	2	4	5	5	4	5	4	3	4	465	2	13	2
2	2	2	3	2	1	3	3	2	2	2	1	1	3	3	1	3	1	1	3	4	4	4	5	5	4	5	5	4	4	5	5	5	166	1	14	1
2	2	2	2	3	2	2	2	2	2	2	2	2	3	3	2	2	3	3	2	1	1	2	3	2	3	4	4	4	4	2	3	3	681	1	13	2
3	3	3	3	1	1	2	3	2	3	2	2	1	3	3	3	3	3	3	3	4	3	4	4	3	3	5	4	3	3	4	5	3	490	2	12	2
2	2	2	3	4	2	2	2	2	2	2	3	2	2	3	2	3	2	3	2	2	2	2	3	2	4	3	4	3	4	4	3	2	609	1	12	2
3	2	2	3	2	2	2	3	2	3	3	2	2	2	2	3	2	2	3	2	2	3	3	3	3	4	4	4	3	4	4	3	4	711	1	14	2
2	2	2	3	2	2	2	3	2	2	2	3	2	2	3	3	2	1	2	2	4	3	2	5	3	3	4	4	3	4	3	4	3	309	2	14	1
3	2	3	3	1	2	3	2	2	1	2	2	3	2	3	2	3	1	2	2	3	1	3	2	1	3	4	5	5	4	3	5	1	97	1	14	1
3	2	3	3	2	2	2	2	2	2	2	2	2	2	3	3	2	3	3	2	2	2	3	3	2	4	4	4	4	4	4	4	4	549	2	13	2
3	2	2	3	3	3	2	2	2	2	3	3	1	1	3	3	2	1	3	3	3	3	3	2	2	4	5	5	3	5	1	5	5	418	2	13	2
2	2	3	3	2	2	2	3	2	2	2	2	3	2	2	3	2	3	2	3	2	2	3	5	3	4	4	3	3	4	2	2	3	625	1	12	2
1	1	2	2	2	1	1	2	1	1	3	3	4	4	4	3	3	3	3	3	3	4	2	3	4	3	3	3	3	3	3	3	3	667	1	13	2
2	1	1	2	2	2	2	3	3	3	3	2	3	2	1	3	1	2	3	2	2	1	1	1	2	4	1	3	4	5	4	3	3	707	1	13	2
3	3	3	3	1	1	2	1	1	2	2	2	3	4	1	1	2	1	3	2	2	2	2	3	3	4	5	5	3	4	4	5	5	698	1	12	2
2	3	2	3	3	2	2	3	1	1	1	3	3	2	1	2	3	3	2	3	3	3	5	5	3	5	5	5	3	3	5	5	5	464	2	13	2
2	2	3	3	1	2	2	2	2	2	2	2	3	2	2	2	2	2	2	1	2	2	2	2	2	3	4	5	3	5	4	4	2	706	1	13	2
2	2	3	3	2	2	2	2	2	2	2	2	2	1	3	3	3	1	3	2	2	2	2	2	2	3	5	3	3	4	4	2	3	67	1	14	1
2	2	3	3	2	2	2	2	2	2	2	2	2	1	3	3	3	1	3	2	2	2	2	2	2	3	5	3	3	4	4	2	3	356	1	14	1
2	1	2	3	2	3	3	2	2	1	2	1	1	2	3	2	2	1	2	2	3	2	3	2	3	3	4	4	3	5	4	2	5	691	1	13	2
2	1	3	2	1	2	2	2	2	2	2	2	2	2	2	2	2	2	2	1	2	2	2	2	2	3	4	4	3	5	4	4	2	735	1	13	2
2	2	2	3	3	2	1	2	3	1	3	3	3	1	1	1	1	1	1	3	2	1	2	3	2	3	5	3	3	5	3	3	3	108	1	14	1
2	3	3	3	2	2	2	3	1	2	1	2	1	3	2	2	2	3	3	1	2	2	3	2	4	3	4	4	5	3	3	3	3	669	1	13	2
3	2	2	3	1	1	2	3	3	2	1	3	1	1	2	1	3	1	1	3	2	2	3	2	3	5	5	4	4	4	4	4	3	705	1	13	2
2	2	2	3	2	2	3	2	2	1	1	2	2	2	2	2	2	2	3	2	2	2	2	2	2	3	3	4	2	4	5	5	5	730	1	13	2
2	2	2	2	2	2	2	2	2	2	2	2	2	1	1	2	2	2	2	2	2	2	2	2	2	4	4	4	4	4	4	4	2	732	1	14	2
3	1	2	1	3	2	1	1	1	1	1	1	2	1	2	1	3	1	1	3	2	1	2	3	3	5	5	5	5	5	5	5	3	129	2	15	1
1	1	3	2	1	1	2	2	2	2	2	2	1	1	3	2	1	1	2	1	1	1	1	2	2	4	5	5	4	5	3	5	5	311	2	14	1
2	1	2	2	3	2	1	2	1	1	2	1	1	2	2	3	1	1	1	1	1	1	2	2	2	4	5	5	4	4	1	1	5	286	2	14	1
2	2	2	3	2	2	1	2	2	2	1	2	2	2	1	2	2	3	2	1	1	1	2	3	2	3	5	5	2	4	4	4	2	510	2	13	2
1	2	2	1	1	1	1	1	1	1	1	1	1	3	3	1	2	1	2	3	3	1	2	2	2	5	5	5	5	4	5	5	5	562	1	12	2
